# Supplementary material
Source: publisher figshare collection journal article supplement (https://gsajournals.figshare.com/ndownloader/files/32118737)
Supplement: Supplementary file 1 [file 32118737]

## Sheet: CD-CpGs mQTLs - Bon 
Blood cis-mQTLs for CD-associated CpGs at Bonferroni level are tested in ileal biopsies (n=40)
SNP	CpGs	Estimates	Pvalue
rs10769150	cg03700417	-0.0157833	0.113022
rs1873057	cg03700417	-0.0187933	0.0813213
rs10769151	cg03700417	-0.0157833	0.113022
rs34219567	cg10065189	-0.021894	0.0408766
rs56245572	cg10065189	-0.021894	0.0408766
rs1109279	cg10065189	-0.021894	0.0408766
rs9906591	cg12582317	5.97809e-05	0.98859
rs886925	cg12582317	5.97809e-05	0.98859
rs1990231	cg12582317	5.97809e-05	0.98859
rs9910446	cg12582317	5.97809e-05	0.98859
rs12451748	cg12582317	5.97809e-05	0.98859
rs12451753	cg12582317	5.97809e-05	0.98859
rs12449409	cg12582317	5.97809e-05	0.98859
rs7220397	cg12582317	5.97809e-05	0.98859
rs8081251	cg12582317	5.97809e-05	0.98859
rs2332966	cg12582317	0.000583577	0.885881
rs9905938	cg12582317	5.97809e-05	0.98859
rs8064970	cg12582317	5.97809e-05	0.98859
rs1109278	cg10065189	-0.0187823	0.0316087
rs4793566	cg12582317	0.000192603	0.962007
rs7211686	cg12582317	0.000192603	0.962007
rs12949028	cg12582317	0.000966211	0.806275
rs12950062	cg12582317	0.000966211	0.806275
rs886926	cg12582317	0.000192603	0.962007
rs7212186	cg12582317	0.000192603	0.962007
rs4793912	cg12582317	0.000604841	0.891855
rs571126	cg19070398	-0.004949	0.383296
rs805883	cg19070398	-0.00467927	0.404943
rs570393;rs796963361;rs59562890	cg19070398	0.00328356	0.573138
rs608938	cg19070398	0.00328356	0.573138
rs6125883	cg00568296	-0.0532085	0.00136931
rs6091092	cg00568296	-0.0445824	0.00553289
rs1076714	cg00568296	-0.0413869	0.0410896
rs6095747	cg00568296	-0.0445824	0.00553289
rs6091091	cg00568296	-0.0445824	0.00553289
rs4662721	cg09152259	0.00938304	0.346981
rs4662724	cg09152259	0.00938304	0.346981
rs12613413	cg09152259	0.00941432	0.335554
rs2276683	cg09152259	0.00938304	0.346981
rs2276682	cg09152259	0.00938304	0.346981
rs10928764	cg09152259	0.00938304	0.346981
rs2090573	cg09152259	0.00938304	0.346981
rs6430937	cg09152259	0.0104125	0.298591
rs13429925	cg09152259	0.0112011	0.250691
rs59027829	cg09152259	0.00857467	0.392856
rs7584659	cg09152259	0.00348952	0.731314
rs4300780	cg09152259	0.00704665	0.470917
rs12613252	cg09152259	0.00704665	0.470917
rs12613254	cg09152259	0.00704665	0.470917
rs13414676	cg09152259	0.00704665	0.470917
rs13390029	cg09152259	0.00704665	0.470917
rs13409933	cg09152259	0.00704665	0.470917
rs28807127	cg09152259	0.00713734	0.452102
rs13017103	cg09152259	0.00713734	0.452102
rs34006114	cg09152259	0.00355695	0.730951
rs11899601	cg09152259	0.00704665	0.470917
rs10167294	cg09152259	0.00704665	0.470917
rs4150434	cg09152259	0.0109459	0.281967
rs12614320	cg09152259	0.0109459	0.281967
rs1143407	cg09152259	0.0109459	0.281967
rs3738948	cg09152259	0.0109459	0.281967
rs4150514	cg09152259	0.0109459	0.281967
rs58063879	cg09152259	0.0109459	0.281967
rs13403918	cg09152259	0.0109459	0.281967
rs12617858	cg09152259	0.0109459	0.281967
rs2134794	cg09152259	0.0109459	0.281967
rs6716392	cg09152259	0.00938304	0.346981
rs35708549	cg09152259	0.00123569	0.905466
rs13034157	cg09152259	0.00123569	0.905466
rs9923	cg09152259	0.00537317	0.60545
rs6735779	cg09152259	0.00292557	0.77463
rs67771362	cg09152259	0.00292557	0.77463
rs11684068	cg09152259	0.00411395	0.670282
rs2139142	cg09152259	0.00411395	0.670282
rs34703177	cg09152259	0.00615239	0.557919
rs34441363	cg09152259	0.00615239	0.557919
rs6738811	cg09152259	0.00615239	0.557919
rs6752139	cg09152259	0.00615239	0.557919
rs147898570	cg09152259	0.00615239	0.557919
rs12619391	cg09152259	0.00549978	0.578075
rs4150506	cg09152259	0.00442043	0.675612
rs34601617	cg09152259	0.00389549	0.704387
rs6747862	cg09152259	0.00613859	0.567554
rs4150492	cg09152259	0.00481701	0.636806
rs12477214	cg09152259	0.00950372	0.32906
rs1850689	cg09152259	0.00947268	0.340824
rs13008440	cg09152259	0.00481701	0.636806
rs4359587	cg09152259	0.00481701	0.636806
rs71343622	cg09152259	-0.00155195	0.879476
rs2069918	cg09152259	0.0074558	0.443985
rs56785718	cg27569037	0.0379194	0.0138671
rs7656235	cg27569037	0.0379194	0.0138671
rs10017705	cg27569037	0.0336566	0.0321322
rs4234892	cg27569037	0.0336566	0.0321322
rs4690807	cg27569037	0.0336566	0.0321322
rs11731244	cg27569037	0.0336566	0.0321322
rs58875777	cg27569037	0.0329386	0.0216582
rs28836897	cg27569037	0.0336566	0.0321322
rs28875870	cg27569037	0.0336566	0.0321322
rs4588419	cg27569037	0.0336566	0.0321322
rs4690808	cg27569037	0.0336566	0.0321322
rs62353271	cg27569037	0.0367813	0.0301675
rs10023382	cg27569037	0.0346098	0.0203113
rs10018252	cg27569037	0.0317558	0.0943407
rs2769355	cg20406979	0.000808659	0.898865
rs2757054	cg20406979	0.000808659	0.898865
rs443570	cg20406979	0.00240417	0.699391
rs366938	cg20406979	0.00240417	0.699391
rs1811121	cg20406979	0.00240417	0.699391
rs394522	cg20406979	0.00240417	0.699391
rs10946199	cg20406979	0.00240417	0.699391
rs1819333	cg20406979	0.00240417	0.699391
rs2013815	cg20406979	0.00240417	0.699391
rs2769349	cg20406979	0.00240417	0.699391
rs1187530	cg20406979	0.00240417	0.699391
rs2757050	cg20406979	0.00240417	0.699391
rs1590257	cg20406979	0.00240417	0.699391
rs2769351	cg20406979	0.00240417	0.699391
rs6939196	cg20406979	0.00240417	0.699391
rs2769354	cg20406979	0.00240417	0.699391
rs2757052	cg20406979	0.00240417	0.699391
rs1211447	cg20406979	0.00240417	0.699391
rs1187532	cg20406979	0.00240417	0.699391
rs434093	cg20406979	0.00240417	0.699391
rs448060	cg20406979	0.00240417	0.699391
rs365189	cg20406979	0.00240417	0.699391
rs376551	cg20406979	0.00240417	0.699391
rs386548	cg20406979	0.00240417	0.699391
rs402749	cg20406979	0.00240417	0.699391
rs385863	cg20406979	0.00240417	0.699391
rs397713	cg20406979	0.00240417	0.699391
rs453184	cg20406979	0.00240417	0.699391
rs436707	cg20406979	0.00240417	0.699391
rs442298	cg20406979	0.00240417	0.699391
rs377753	cg20406979	0.00240417	0.699391
rs430477	cg20406979	0.00240417	0.699391
rs376574	cg20406979	0.00240417	0.699391
rs439237	cg20406979	0.00240417	0.699391
rs9457247	cg20406979	0.00240417	0.699391
rs9459827	cg20406979	0.00240417	0.699391
rs1794699	cg20406979	0.00240417	0.699391
rs1743439	cg20406979	0.00240417	0.699391
rs13192426	cg20406979	0.00240417	0.699391
rs13192687	cg20406979	0.00240417	0.699391
rs9717548	cg20406979	0.00240417	0.699391
rs5020533	cg20406979	0.00240417	0.699391
rs1620933	cg20406979	0.00240417	0.699391
rs415987	cg20406979	0.00240417	0.699391
rs1794697	cg20406979	0.00240417	0.699391
rs34560498;rs386708543	cg20406979	0.00240417	0.699391
rs414437	cg20406979	0.00240417	0.699391
rs421214	cg20406979	0.00240417	0.699391
rs422094	cg20406979	0.00240417	0.699391
rs393558	cg20406979	0.00240417	0.699391
rs436625	cg20406979	0.00240417	0.699391
rs408040	cg20406979	0.00240417	0.699391
rs408918	cg20406979	0.00240417	0.699391
rs413232	cg20406979	0.00240417	0.699391
rs86755	cg20406979	0.00240417	0.699391
rs382009	cg20406979	0.00240417	0.699391
rs428805	cg20406979	0.00240417	0.699391
rs2345571	cg20406979	0.00240417	0.699391
rs385460	cg20406979	0.00240417	0.699391
rs385113	cg20406979	0.00240417	0.699391
rs932644	cg20406979	0.00240417	0.699391
rs10946198	cg20406979	0.00240417	0.699391
rs1743440	cg20406979	0.00240417	0.699391
rs1743441	cg20406979	0.00240417	0.699391
rs1794694	cg20406979	0.00240417	0.699391
rs430293	cg20406979	0.00240417	0.699391
rs430097	cg20406979	0.00240417	0.699391
rs409356	cg20406979	0.00240417	0.699391
rs447042	cg20406979	0.00240417	0.699391
rs402191	cg20406979	0.00240417	0.699391
rs1794693	cg20406979	0.00240417	0.699391
rs401260	cg20406979	0.00240417	0.699391
rs422694	cg20406979	0.00240417	0.699391
rs422780	cg20406979	0.00240417	0.699391
rs400176	cg20406979	0.00240417	0.699391
rs422562	cg20406979	0.00240417	0.699391
rs416131	cg20406979	0.00240417	0.699391
rs415890	cg20406979	0.00240417	0.699391
rs415842	cg20406979	0.00240417	0.699391
rs389956	cg20406979	0.00240417	0.699391
rs389946	cg20406979	0.00240417	0.699391
rs401261	cg20406979	0.00240417	0.699391
rs2015864	cg20406979	0.000469269	0.936792
rs1811123	cg20406979	0.00249876	0.694431
rs364283	cg20406979	0.00365389	0.54339
rs429083	cg20406979	0.00365389	0.54339
rs393727	cg20406979	0.00240417	0.699391
rs4710147	cg20406979	0.00240417	0.699391
rs2757046	cg20406979	0.00240417	0.699391
rs2757047	cg20406979	0.00240417	0.699391
rs405553	cg20406979	0.00240417	0.699391
rs2345573	cg20406979	0.00240417	0.699391
rs407515	cg20406979	0.00240417	0.699391
rs406095	cg20406979	0.00240417	0.699391
rs4710160	cg20406979	0.00240417	0.699391
rs4710161	cg20406979	0.00240417	0.699391
rs388406	cg20406979	0.00240417	0.699391
rs430145	cg20406979	0.00240417	0.699391
rs425039	cg20406979	0.00240417	0.699391
rs376097	cg20406979	0.00240417	0.699391
rs424185	cg20406979	0.00240417	0.699391
rs400837	cg20406979	0.00240417	0.699391
rs4997107	cg20406979	0.00240417	0.699391
rs439553	cg20406979	-0.00511551	0.429673
rs2149083	cg20406979	0.00240417	0.699391
rs2149084	cg20406979	0.00240417	0.699391
rs2769346	cg20406979	0.00240417	0.699391
rs2149085	cg20406979	0.00240417	0.699391
rs2769347	cg20406979	0.00240417	0.699391
rs2769348	cg20406979	0.00240417	0.699391
rs2149090	cg20406979	0.00240417	0.699391
rs2149091	cg20406979	0.00240417	0.699391
rs2149092	cg20406979	0.00240417	0.699391
rs444210	cg20406979	-0.00855179	0.171935
rs400063	cg20406979	-0.00511551	0.429673
rs1794700	cg20406979	-0.00511551	0.429673
rs2757044	cg20406979	0.00240417	0.699391
rs433191	cg20406979	0.0016554	0.79714
rs408087	cg20406979	-0.00511551	0.429673
rs387733	cg20406979	0.00240417	0.699391
rs377232	cg20406979	-0.00455469	0.499799
rs1044059	cg20406979	0.00236543	0.722921
rs2757042	cg20406979	0.00388769	0.549454
rs398278	cg20406979	0.00388769	0.549454
rs364451	cg20406979	0.00407951	0.537142
rs239935	cg20406979	0.00388769	0.549454
rs1322077	cg20406979	0.00478865	0.412447
rs9457249	cg20406979	0.00478865	0.412447
rs9457251	cg20406979	0.00478865	0.412447
rs2149093	cg20406979	0.00388769	0.549454
rs444988	cg20406979	0.00388769	0.549454
rs408080	cg20406979	0.00388769	0.549454
rs1794696	cg20406979	0.00388769	0.549454
rs404222	cg20406979	0.00388769	0.549454
rs9348211	cg20406979	0.00236543	0.722921
rs6920364	cg20406979	0.00236543	0.722921
rs2769352	cg20406979	0.00236543	0.722921
rs1811120	cg20406979	0.00236543	0.722921
rs427824	cg20406979	0.00236543	0.722921
rs9717862	cg20406979	0.00236543	0.722921
rs239934	cg20406979	0.00236543	0.722921
rs4346838	cg20406979	0.00246355	0.717733
rs2345572	cg20406979	0.00246355	0.717733
rs9459835	cg20406979	0.00994894	0.07848
rs6929466	cg20406979	0.00767331	0.204788
rs9459840	cg20406979	0.00767331	0.204788
rs9459841	cg20406979	0.00767331	0.204788
rs6904946	cg20406979	0.00767331	0.204788
rs6900701	cg20406979	0.00767331	0.204788
rs6923582	cg20406979	0.00767331	0.204788
rs2237276	cg20406979	0.00767331	0.204788
rs13195812	cg20406979	0.00767331	0.204788
rs9295385	cg20406979	0.00767331	0.204788
rs35171809	cg20406979	0.0105498	0.0816199
rs12526548	cg20406979	0.0105498	0.0816199
rs9459839	cg20406979	0.0105498	0.0816199
rs1894603	cg20406979	0.0105498	0.0816199
rs9459845	cg20406979	0.0105498	0.0816199
rs9457257	cg20406979	0.0105498	0.0816199
rs9459846	cg20406979	0.0105498	0.0816199
rs6456146	cg20406979	0.0105498	0.0816199
rs9295384	cg20406979	0.0105498	0.0816199
rs239933	cg20406979	0.0105498	0.0816199
rs9459842	cg20406979	0.0105498	0.0816199
rs7749278	cg20406979	0.0105498	0.0816199
rs2282861	cg20406979	0.0105498	0.0816199
rs2282860	cg20406979	0.0105498	0.0816199
rs2181059	cg20406979	0.0105498	0.0816199
rs2237277	cg20406979	0.0105498	0.0816199
rs9457258	cg20406979	0.0105498	0.0816199
rs10946205	cg20406979	0.0105498	0.0816199
rs6456143	cg20406979	0.0105498	0.0816199
rs2237273	cg20406979	0.0105498	0.0816199
rs2237275	cg20406979	0.0105498	0.0816199
rs2237274	cg20406979	0.0105498	0.0816199
rs2301436	cg20406979	0.00927262	0.133243
rs10484531	cg20406979	0.00509245	0.413472
rs376571402	cg20406979	0.0100092	0.111771
rs386708545;rs200447952;rs79452434	cg20406979	0.00962708	0.132241
rs10946203	cg20406979	0.00632845	0.297248
rs9459836	cg20406979	0.00632845	0.297248
rs12212247	cg20406979	0.00632845	0.297248
rs9457254	cg20406979	0.00632845	0.297248
rs2237272	cg20406979	0.00632845	0.297248
rs10455982	cg20406979	0.00632845	0.297248
rs9459838	cg20406979	0.00632845	0.297248
rs9457256	cg20406979	0.00509245	0.413472
rs1060404	cg20406979	0.00509245	0.413472
rs4710171	cg20406979	0.00509245	0.413472
rs9457252	cg20406979	0.00509245	0.413472
rs3752520	cg20406979	0.00509245	0.413472
rs9459849	cg20406979	0.00509245	0.413472
rs9457259	cg20406979	0.00509245	0.413472
rs10946204	cg20406979	0.00509245	0.413472
rs6456150	cg20406979	0.0132375	0.0381426
rs6909180	cg20406979	0.0137909	0.0310845
rs12213683	cg20406979	0.0137909	0.0310845
rs12529876	cg20406979	0.0137909	0.0310845
rs12528323	cg20406979	0.0137909	0.0310845
rs12528689	cg20406979	0.0137909	0.0310845
rs13208636	cg20406979	0.0137909	0.0310845
rs6932740	cg20406979	0.0137909	0.0310845
rs6934043	cg20406979	0.0137909	0.0310845
rs1358882	cg20406979	0.0137909	0.0310845
rs1358883	cg20406979	0.0137909	0.0310845
rs9457261	cg20406979	0.0137909	0.0310845
rs1407315	cg20406979	0.0137909	0.0310845
rs12527827	cg20406979	0.0137909	0.0310845
rs12529959	cg20406979	0.0137909	0.0310845
rs6909475	cg20406979	0.0137909	0.0310845
rs6909502	cg20406979	0.0137909	0.0310845
rs12523712	cg20406979	0.0137909	0.0310845
rs911632	cg20406979	0.0137909	0.0310845
rs1810644	cg20406979	0.0137909	0.0310845
rs1810645	cg20406979	0.0137909	0.0310845
rs2017338	cg20406979	0.0137909	0.0310845
rs6456151	cg20406979	0.0137909	0.0310845
rs6456153	cg20406979	0.0137909	0.0310845
rs6456154	cg20406979	0.0137909	0.0310845
rs12203510	cg20406979	0.0137909	0.0310845
rs13195158	cg20406979	0.0137909	0.0310845
rs2187859	cg20406979	0.0137909	0.0310845
rs9457266	cg20406979	0.0137909	0.0310845
rs7750209	cg20406979	0.0137909	0.0310845
rs7746628	cg20406979	0.0137909	0.0310845
rs4598049	cg20406979	0.0137909	0.0310845
rs2345753	cg20406979	0.0137909	0.0310845
rs2345754	cg20406979	0.0137909	0.0310845
rs7761977	cg20406979	0.0137909	0.0310845
rs7742305	cg20406979	0.0137909	0.0310845
rs7762156	cg20406979	0.0137909	0.0310845
rs2001115	cg20406979	0.0137909	0.0310845
rs9459862	cg20406979	0.0137909	0.0310845
rs6456149	cg20406979	0.0137909	0.0310845
rs2181058	cg20406979	0.0137909	0.0310845
rs12529238	cg20406979	0.0137909	0.0310845
rs7748224	cg20406979	0.0137909	0.0310845
rs6936261	cg20406979	0.0137909	0.0310845
rs13210649	cg20406979	0.0137909	0.0310845
rs12213801	cg20406979	0.0137909	0.0310845
rs9457265	cg20406979	0.0137909	0.0310845
rs9459853	cg20406979	0.0137909	0.0310845
rs78742057	cg20859453	-0.130265	0.000320342
rs73645935	cg20859453	-0.130265	0.000320342
rs6475024	cg20859453	-0.130265	0.000320342
rs16977599	cg12421287	0.025801	0.0377276
rs7225724	cg15815084	0.0284142	0.548915
rs6503775	cg15815084	0.0284142	0.548915
rs4365350	cg15815084	0.0284142	0.548915
rs8071825	cg15815084	0.0284142	0.548915
rs9892183	cg15815084	0.0284142	0.548915
rs2203894	cg15815084	0.0568689	0.175788
rs6503769	cg15815084	0.0284142	0.548915
rs12600529	cg15815084	0.0284142	0.548915
rs1970872	cg15815084	0.0568689	0.175788
rs3867602	cg15815084	0.0568689	0.175788
rs6503768	cg15815084	0.0305353	0.502456
rs71373396	cg15815084	0.0284142	0.548915
rs6428525	cg23747839	-0.0831428	3.82801e-05
rs7970524	cg27246571	-0.0023569	0.439629
rs2540499	cg27246571	-0.00142456	0.655317
rs2540498	cg27246571	-0.00142456	0.655317
rs7134860	cg27246571	-0.00122901	0.695004
rs7134975	cg27246571	-0.00122901	0.695004
rs7306086	cg27246571	-0.00122901	0.695004
rs61937880	cg27246571	-0.00122901	0.695004
rs61937881	cg27246571	-0.00122901	0.695004
rs17677343	cg27246571	-0.00142456	0.655317
rs2660892	cg27246571	-0.00142456	0.655317
rs2660891	cg27246571	-0.00123439	0.70514
rs2540488	cg27246571	-0.00139067	0.655585
rs2247304	cg27246571	-0.00139067	0.655585
rs2660838	cg27246571	-0.00142456	0.655317
rs2540493	cg27246571	-0.00142456	0.655317
rs2540497	cg27246571	-0.00142456	0.655317
rs2660900	cg27246571	-0.00142456	0.655317
rs7297245	cg27246571	0.000426875	0.911988
rs10745746	cg27246571	-0.000282292	0.944353
rs4762659	cg27246571	-0.000282292	0.944353
rs7966537	cg27246571	0.00026989	0.946043
rs17676451	cg27246571	0.00026989	0.946043
rs17733203	cg27246571	-0.000105681	0.977558
rs73216216	cg27246571	-0.000105681	0.977558
rs56361316	cg27246571	-0.000105681	0.977558
rs56396137	cg27246571	-0.00071877	0.85061
rs2071556	cg09017117	-0.00169082	0.875345
rs8047999	cg22873414	-0.0105114	0.309668
rs8051462	cg22873414	-0.00679078	0.498752
rs903202	cg22873414	-0.0105114	0.309668
rs386793608;rs1519976	cg22873414	0.000733113	0.943691
rs768410	cg22873414	0.000733113	0.943691
rs199612119;rs147968	cg22873414	-0.00345131	0.731993
rs2238645	cg02370334	-0.0221453	0.0109152
rs3212701	cg02370334	-0.0221453	0.0109152
rs2238644	cg02370334	-0.0214416	0.0199768
rs8100347	cg02370334	-0.0221453	0.0109152
rs935471	cg11878712	0.00272763	0.883992
rs3791268	cg11878712	0.00111135	0.950899
rs3791264	cg11878712	0.00111135	0.950899
rs11695371	cg11878712	0.00111135	0.950899
rs11676854	cg11878712	0.00111135	0.950899
rs7576554	cg11878712	0.00111135	0.950899
rs7593036	cg11878712	0.00111135	0.950899
rs6757621	cg11878712	0.00111135	0.950899
rs57223057	cg11878712	0.00111135	0.950899
rs7596803	cg11878712	0.00111135	0.950899
rs2793381	cg02280892	0.0400134	0.0125525
rs2249731	cg02280892	0.0400134	0.0125525
rs1317170	cg02280892	0.0439709	0.0142399
rs2570367	cg02280892	0.0439709	0.0142399
rs6426551	cg02280892	0.0326528	0.013282
rs7517174	cg02280892	0.0320145	0.0208213
rs6668851	cg02280892	0.0320145	0.0208213
rs6702917	cg02280892	0.0320145	0.0208213
rs4789155	cg02433148	0.0180237	0.150336
rs9900933	cg23470227	-0.0133349	0.0905362
rs9903858	cg23470227	-0.00603333	0.439964
rs8069105	cg23470227	-0.00927739	0.232098
rs1047743	cg23470227	-0.00603333	0.439964
rs4485425	cg23470227	-0.0121655	0.11202
rs73352129	cg23470227	-0.0121655	0.11202
rs67740167	cg23470227	-0.0121655	0.11202
rs78057960	cg23470227	-0.0121655	0.11202
rs8076052	cg23470227	-0.0121655	0.11202
rs2125345;rs558180280	cg23470227	-0.0121655	0.11202
rs11652539	cg23470227	-0.00698685	0.368227
rs11652261	cg23470227	-0.00698685	0.368227
rs878371	cg23470227	-0.0107218	0.180776
rs11658385	cg23470227	-0.0107218	0.180776
rs1135688	cg23470227	-0.00714332	0.378154
rs28578956	cg23470227	-0.00743515	0.351481
rs4789229	cg23470227	-0.00698685	0.368227
rs7218058	cg23470227	-0.0095116	0.211697
rs10221244	cg23470227	-0.00519244	0.52645
rs12600868	cg23470227	-0.00698685	0.368227
rs8081539	cg23470227	-0.00698685	0.368227
rs55636440	cg23470227	-0.00384545	0.624483
rs35757209	cg23470227	-0.00384545	0.624483
rs2061387	cg23470227	-0.0095116	0.211697
rs7217432	cg23470227	-0.0095116	0.211697
rs7216615	cg23470227	-0.0107056	0.176981
rs4789227	cg23470227	-0.00384545	0.624483
rs7217536	cg23470227	-0.0095116	0.211697
rs7216512	cg23470227	-0.0095116	0.211697
rs12602430	cg23470227	-0.0095116	0.211697
rs12603812	cg23470227	-0.0095116	0.211697
rs7221792	cg23470227	-0.0095116	0.211697
rs7223416	cg23470227	-0.0095116	0.211697
rs9894244	cg23470227	-0.00996654	0.197206
rs9894291	cg23470227	-0.00996654	0.197206
rs3744006	cg23470227	-0.00996654	0.197206
rs9897048	cg23470227	-0.00996654	0.197206
rs8074963	cg23470227	-0.00996654	0.197206
rs8067076	cg23470227	-0.00982786	0.199997
rs11655389	cg23470227	-0.00941547	0.209651
rs35103294	cg23470227	-0.0117771	0.104366
rs1979215	cg23470227	-0.00972618	0.221585
rs55913048	cg02893324	0.000743653	0.857385
rs56151459	cg02893324	0.000743653	0.857385
rs13032010	cg02893324	0.000743653	0.857385
rs55894868	cg02893324	0.000743653	0.857385
rs12990553	cg02893324	0.000743653	0.857385
rs3769161	cg02893324	0.000743653	0.857385
rs56084435	cg02893324	0.00231152	0.571966
rs375004057	cg02893324	0.00231152	0.571966
rs377400560	cg02893324	0.00231152	0.571966
rs36053895;rs386355408	cg02893324	1.33957e-05	0.997391
rs2076857	cg02893324	0.00027631	0.939835
rs10930579	cg02893324	1.33957e-05	0.997391
rs13008554	cg02893324	0.00141681	0.748046
rs17761169	cg02893324	0.00175431	0.684027
rs2028382	cg02893324	0.00185446	0.642576
rs3769167	cg02893324	-0.00161492	0.726134
rs2289399	cg02893324	0.00141681	0.748046
rs3754741	cg02893324	0.00141681	0.748046
rs2742421	cg15361247	0.0697099	6.1759e-06
rs9877499	cg15361247	0.0689102	9.10482e-06
rs2742417	cg15361247	0.0669936	8.57539e-06
rs2251954	cg15361247	0.0669936	8.57539e-06
rs2673035;rs142054397	cg15361247	0.0697099	6.1759e-06
rs2742420	cg15361247	0.0697099	6.1759e-06
rs2673051	cg15361247	0.0697099	6.1759e-06
rs2742422	cg15361247	0.0697099	6.1759e-06
rs2742423	cg15361247	0.0697099	6.1759e-06
rs17328701	cg15361247	0.0697099	6.1759e-06
rs1969624	cg15361247	0.0697099	6.1759e-06
rs1969625	cg15361247	0.0697099	6.1759e-06
rs1609553	cg15361247	0.0697099	6.1759e-06
rs1609554	cg15361247	0.0697099	6.1759e-06
rs2673058	cg15361247	0.0697099	6.1759e-06
rs2673057	cg15361247	0.0697099	6.1759e-06
rs2742426	cg15361247	0.0697099	6.1759e-06
rs2742427	cg15361247	0.0697099	6.1759e-06
rs2742429	cg15361247	0.0697099	6.1759e-06
rs2742430	cg15361247	0.0697099	6.1759e-06
rs2742431	cg15361247	0.0697099	6.1759e-06
rs2742432	cg15361247	0.0697099	6.1759e-06
rs2673056	cg15361247	0.0697099	6.1759e-06
rs9825559	cg15361247	0.0697099	6.1759e-06
rs9809868	cg15361247	0.0697099	6.1759e-06
rs9829631	cg15361247	0.0697099	6.1759e-06
rs1534875	cg15361247	0.0697099	6.1759e-06
rs1534876	cg15361247	0.0697099	6.1759e-06
rs2673047	cg15361247	0.0697099	6.1759e-06
rs2742438	cg15361247	0.0697099	6.1759e-06
rs2742439	cg15361247	0.0697099	6.1759e-06
rs938363;rs34519783	cg15361247	0.0697099	6.1759e-06
rs938362	cg15361247	0.0697099	6.1759e-06
rs1969626	cg15361247	0.0697099	6.1759e-06
rs2373047	cg15361247	0.0697099	6.1759e-06
rs2742441	cg15361247	0.0697099	6.1759e-06
rs2742442	cg15361247	0.0697099	6.1759e-06
rs2673038	cg15361247	0.0697099	6.1759e-06
rs2673037	cg15361247	0.0697099	6.1759e-06
rs2245705	cg15361247	0.0697099	6.1759e-06
rs1883096	cg15361247	0.0697099	6.1759e-06
rs2673036	cg15361247	0.0697099	6.1759e-06
rs2742445	cg15361247	0.0697099	6.1759e-06
rs1877934	cg15361247	0.0697099	6.1759e-06
rs1877933	cg15361247	0.0697099	6.1759e-06
rs1877932	cg15361247	0.0697099	6.1759e-06
rs2742369	cg15361247	0.0697099	6.1759e-06
rs2248991	cg15361247	0.0697099	6.1759e-06
rs2673034	cg15361247	0.0697099	6.1759e-06
rs2742385	cg15361247	0.0697099	6.1759e-06
rs2742389	cg15361247	0.0697099	6.1759e-06
rs2742390	cg15361247	0.0697099	6.1759e-06
rs2742393	cg15361247	0.0697099	6.1759e-06
rs2742373	cg15361247	0.0697099	6.1759e-06
rs2673025	cg15361247	0.0697099	6.1759e-06
rs2742452	cg15361247	0.0697099	6.1759e-06
rs2673065	cg15361247	0.0697099	6.1759e-06
rs2742462	cg15361247	0.0697099	6.1759e-06
rs2742368	cg15361247	0.069268	1.21276e-05
rs2742418	cg15361247	0.0697099	6.1759e-06
rs2742419	cg15361247	0.0697099	6.1759e-06
rs2742386	cg15361247	0.0697099	6.1759e-06
rs6800556	cg15361247	0.0685372	2.44523e-05
rs2673052	cg15361247	0.0718598	4.26036e-06
rs2673033	cg15361247	0.0683353	3.51677e-06
rs2251021	cg15361247	-0.0538522	0.000739872
rs2673049	cg15361247	-0.066157	6.23003e-05
rs2742392	cg15361247	-0.066157	6.23003e-05
rs2742447	cg15361247	-0.066157	6.23003e-05
rs12633747	cg15361247	-0.066157	6.23003e-05
rs2673053	cg15361247	-0.0523435	0.0075482
rs2742424	cg15361247	-0.0523435	0.0075482
rs2742433	cg15361247	-0.0523435	0.0075482
rs767280	cg15361247	-0.0669732	6.94596e-05
rs1468543	cg15361247	-0.0669732	6.94596e-05
rs2742406	cg15361247	-0.0669732	6.94596e-05
rs9311378	cg15361247	-0.0669732	6.94596e-05
rs2742454	cg15361247	-0.0669732	6.94596e-05
rs2742435	cg15361247	-0.0669732	6.94596e-05
rs2742436	cg15361247	-0.0669732	6.94596e-05
rs2742437	cg15361247	-0.0669732	6.94596e-05
rs2673039	cg15361247	-0.0669732	6.94596e-05
rs2249357	cg15361247	-0.0669732	6.94596e-05
rs2742397	cg15361247	-0.0669732	6.94596e-05
rs2673028	cg15361247	-0.0669732	6.94596e-05
rs9821974;rs71622516	cg15361247	-0.0669732	6.94596e-05

## Sheet: CD-CpGs mQTLs - FDR
Blood cis-mQTLs for CD-associated CpGs at FDR level are tested in ileal biopsies (n=40)
SNP	CpGs	beta	t.stat	p.value	FDR
rs6125883	cg00568296	-0.0833797	-14.0646	1.07471e-32	1.52903e-27
rs34219567	cg10065189	-0.0570005	-13.1551	1.0014e-29	9.97304e-25
rs56245572	cg10065189	-0.0570005	-13.1551	1.0014e-29	9.97304e-25
rs1109279	cg10065189	-0.0570005	-13.1551	1.0014e-29	9.97304e-25
rs2793381	cg02280892	0.102721	12.0509	3.72075e-26	3.98445e-22
rs2249731	cg02280892	0.0988811	11.5484	1.49686e-24	1.29217e-20
rs1317170	cg02280892	0.0983995	11.4103	4.10555e-24	3.14521e-20
rs2570367	cg02280892	0.0983995	11.4103	4.10555e-24	3.14521e-20
rs6091092	cg00568296	-0.0940979	-10.7432	5.11967e-22	3.64196e-18
rs1076714	cg00568296	-0.0735	-10.6947	7.2482e-22	5.04796e-18
rs6095747	cg00568296	-0.093421	-10.2268	2.0196e-20	1.14281e-16
rs2238645	cg02370334	-0.0548139	-10.1987	2.4616e-20	1.38505e-16
rs6091091	cg00568296	-0.0932868	-10.0604	6.50948e-20	3.24759e-16
rs3212701	cg02370334	-0.0535068	-9.99048	1.06274e-19	5.03997e-16
rs2238644	cg02370334	-0.0533736	-9.73796	6.16825e-19	2.53845e-15
rs8100347	cg02370334	-0.0526214	-9.57402	1.91383e-18	7.21971e-15
rs58875777	cg27569037	0.0599141	9.35051	8.84912e-18	3.06005e-14
rs1109278	cg10065189	-0.0390533	-8.62726	1.12492e-15	2.55782e-12
rs6426551	cg02280892	0.0729145	8.44217	3.77427e-15	8.20709e-12
rs7517174	cg02280892	0.0726778	8.40478	4.8122e-15	1.0396e-11
rs10023382	cg27569037	0.0552752	8.40273	4.87666e-15	1.05124e-11
rs6668851	cg02280892	0.0704383	8.27034	1.14759e-14	2.42654e-11
rs6456150	cg20406979	0.0463926	8.22431	1.54288e-14	3.24173e-11
rs6702917	cg02280892	0.071381	8.20577	1.73777e-14	3.63109e-11
rs6932740	cg20406979	0.0462293	8.19201	1.89795e-14	3.67701e-11
rs6934043	cg20406979	0.0462293	8.19201	1.89795e-14	3.67701e-11
rs1358882	cg20406979	0.0462293	8.19201	1.89795e-14	3.67701e-11
rs1358883	cg20406979	0.0462293	8.19201	1.89795e-14	3.67701e-11
rs9457261	cg20406979	0.0462293	8.19201	1.89795e-14	3.67701e-11
rs1407315	cg20406979	0.0462293	8.19201	1.89795e-14	3.67701e-11
rs12527827	cg20406979	0.0462293	8.19201	1.89795e-14	3.67701e-11
rs12529959	cg20406979	0.0462293	8.19201	1.89795e-14	3.67701e-11
rs6909475	cg20406979	0.0462293	8.19201	1.89795e-14	3.67701e-11
rs6909502	cg20406979	0.0462293	8.19201	1.89795e-14	3.67701e-11
rs12523712	cg20406979	0.0462293	8.19201	1.89795e-14	3.67701e-11
rs911632	cg20406979	0.0462293	8.19201	1.89795e-14	3.67701e-11
rs1810644	cg20406979	0.0462293	8.19201	1.89795e-14	3.67701e-11
rs1810645	cg20406979	0.0462293	8.19201	1.89795e-14	3.67701e-11
rs2017338	cg20406979	0.0462293	8.19201	1.89795e-14	3.67701e-11
rs6456151	cg20406979	0.0462293	8.19201	1.89795e-14	3.67701e-11
rs6456153	cg20406979	0.0462293	8.19201	1.89795e-14	3.67701e-11
rs6456154	cg20406979	0.0462293	8.19201	1.89795e-14	3.67701e-11
rs12203510	cg20406979	0.0462293	8.19201	1.89795e-14	3.67701e-11
rs13195158	cg20406979	0.0462293	8.19201	1.89795e-14	3.67701e-11
rs2187859	cg20406979	0.0462293	8.19201	1.89795e-14	3.67701e-11
rs9457266	cg20406979	0.0462293	8.19201	1.89795e-14	3.67701e-11
rs7750209	cg20406979	0.0462293	8.19201	1.89795e-14	3.67701e-11
rs7746628	cg20406979	0.0462293	8.19201	1.89795e-14	3.67701e-11
rs4598049	cg20406979	0.0462293	8.19201	1.89795e-14	3.67701e-11
rs2345753	cg20406979	0.0462293	8.19201	1.89795e-14	3.67701e-11
rs2345754	cg20406979	0.0462293	8.19201	1.89795e-14	3.67701e-11
rs7761977	cg20406979	0.0462293	8.19201	1.89795e-14	3.67701e-11
rs7742305	cg20406979	0.0462293	8.19201	1.89795e-14	3.67701e-11
rs7762156	cg20406979	0.0462293	8.19201	1.89795e-14	3.67701e-11
rs2001115	cg20406979	0.0462293	8.19201	1.89795e-14	3.67701e-11
rs9459862	cg20406979	0.0462293	8.19201	1.89795e-14	3.67701e-11
rs6909180	cg20406979	0.0464452	8.19173	1.90143e-14	3.67701e-11
rs12213683	cg20406979	0.0464452	8.19173	1.90143e-14	3.67701e-11
rs12529876	cg20406979	0.0464452	8.19173	1.90143e-14	3.67701e-11
rs12528323	cg20406979	0.0464452	8.19173	1.90143e-14	3.67701e-11
rs12528689	cg20406979	0.0464452	8.19173	1.90143e-14	3.67701e-11
rs13208636	cg20406979	0.0464452	8.19173	1.90143e-14	3.67701e-11
rs7748224	cg20406979	0.0465709	8.18619	1.97001e-14	3.80224e-11
rs6456149	cg20406979	0.0464047	8.18296	2.01128e-14	3.85947e-11
rs2181058	cg20406979	0.0464047	8.18296	2.01128e-14	3.85947e-11
rs12529238	cg20406979	0.0464047	8.18296	2.01128e-14	3.85947e-11
rs6936261	cg20406979	0.0458963	8.12251	2.95976e-14	5.60392e-11
rs13210649	cg20406979	0.0458963	8.12251	2.95976e-14	5.60392e-11
rs12213801	cg20406979	0.0458963	8.12251	2.95976e-14	5.60392e-11
rs9457265	cg20406979	0.0458963	8.12251	2.95976e-14	5.60392e-11
rs9459853	cg20406979	0.0460667	8.11242	3.15646e-14	5.95371e-11
rs12525345	cg20406979	0.0456755	8.03871	5.04417e-14	9.30287e-11
rs6512230	cg02370334	-0.044107	-7.96763	7.90989e-14	1.4271e-10
rs720325	cg20406979	0.0452166	7.90373	1.18317e-13	2.03162e-10
rs79268829	cg05840754	-0.0735112	-7.76723	2.77982e-13	4.55338e-10
rs75893338	cg05840754	-0.0726979	-7.76218	2.86873e-13	4.67595e-10
rs6509196	cg05840754	-0.0770544	-7.75646	2.97272e-13	4.83753e-10
rs60864846	cg05840754	-0.0769417	-7.72255	3.67016e-13	5.90494e-10
rs7258183	cg05840754	-0.0764227	-7.67766	4.84775e-13	7.61504e-10
rs73562275	cg05840754	-0.0764227	-7.67766	4.84775e-13	7.61504e-10
rs73562265	cg05840754	-0.0763235	-7.65959	5.4211e-13	8.48891e-10
rs35798859;rs531335101	cg20406979	0.0455882	7.54866	1.07308e-12	1.65947e-09
rs9675230	cg23470227	-0.0395809	-7.48925	1.54322e-12	2.35723e-09
rs3212713;rs386807459	cg02370334	-0.0415835	-7.48696	1.56495e-12	2.38676e-09
rs3212711	cg02370334	-0.0415236	-7.44829	1.98074e-12	2.97085e-09
rs8078208	cg23470227	-0.0393755	-7.44256	2.05095e-12	3.07154e-09
rs2285148	cg20406979	0.0442809	7.37302	3.12698e-12	4.6068e-09
rs58413607	cg25690897	-0.0541362	-7.23503	7.17138e-12	1.0145e-08
rs12525855	cg20406979	0.0431757	7.23401	7.21505e-12	1.01634e-08
rs10946209	cg20406979	0.0431757	7.23401	7.21505e-12	1.01634e-08
rs2001114	cg20406979	0.0431757	7.23401	7.21505e-12	1.01634e-08
rs62436765	cg20406979	0.0433818	7.23121	7.33717e-12	1.03063e-08
rs10946208	cg20406979	0.0433818	7.23121	7.33717e-12	1.03063e-08
rs998247	cg00302379	-0.0242678	-7.21692	7.99108e-12	1.11151e-08
rs10143198	cg00302379	-0.0242678	-7.21692	7.99108e-12	1.11151e-08
rs8078452	cg23470227	-0.0381905	-7.09817	1.61862e-11	1.89425e-08
rs12198816	cg20406979	0.0424001	7.05347	2.10741e-11	2.43763e-08
rs1957949	cg00302379	-0.0238825	-7.03995	2.28202e-11	2.62739e-08
rs17527080	cg06726471	0.0460808	6.96508	3.54051e-11	3.92655e-08
rs57425612	cg25690897	-0.0518899	-6.9376	4.15673e-11	4.54417e-08
rs13183947	cg06726471	0.0465168	6.87713	5.90919e-11	6.29416e-08
rs6886940	cg06726471	0.0465159	6.86048	6.50812e-11	6.82266e-08
rs2093989	cg00302379	0.0228325	6.85431	6.74479e-11	7.05591e-08
rs4899161	cg00302379	0.0236007	6.80664	8.88346e-11	9.00932e-08
rs7156617	cg00302379	0.0235175	6.7815	1.02673e-10	1.03286e-07
rs4902359	cg00302379	0.0234304	6.72821	1.39394e-10	1.37586e-07
rs6983152	cg19750024	-0.0275566	-6.71847	1.4738e-10	1.45325e-07
rs4710176	cg20406979	0.0411052	6.70806	1.56413e-10	1.53919e-07
rs8008095	cg00302379	-0.0234939	-6.70314	1.60872e-10	1.57382e-07
rs7152277	cg00302379	-0.0234506	-6.69592	1.67635e-10	1.63302e-07
rs7158239	cg00302379	-0.0234477	-6.69496	1.68557e-10	1.63614e-07
rs8011585	cg00302379	-0.0234477	-6.69496	1.68557e-10	1.63614e-07
rs8015921	cg00302379	-0.0234477	-6.69496	1.68557e-10	1.63614e-07
rs7150646	cg00302379	0.0234736	6.69058	1.72825e-10	1.67268e-07
rs4902357	cg00302379	0.0234736	6.69058	1.72825e-10	1.67268e-07
rs6887245	cg06726471	0.045624	6.6415	2.28496e-10	2.16932e-07
rs62360772	cg06726471	0.045624	6.6415	2.28496e-10	2.16932e-07
rs56206837	cg06726471	0.0375829	6.63457	2.37666e-10	2.25424e-07
rs34184001	cg00302379	0.0220937	6.62994	2.43994e-10	2.30986e-07
rs11959574	cg06726471	0.0373847	6.59554	2.96454e-10	2.75979e-07
rs62363268	cg06726471	0.0373847	6.59554	2.96454e-10	2.75979e-07
rs4307102	cg06726471	0.0373847	6.59554	2.96454e-10	2.75979e-07
rs4075638	cg06726471	0.0373847	6.59554	2.96454e-10	2.75979e-07
rs11627485	cg00302379	0.0228389	6.55779	3.66804e-10	3.28512e-07
rs75468875	cg23747839	-0.0393177	-6.55659	3.69293e-10	3.30444e-07
rs4075637	cg06726471	0.0371812	6.54201	4.00866e-10	3.56135e-07
rs35033486	cg06726471	0.0439562	6.50952	4.81065e-10	4.22113e-07
rs11948747	cg06726471	0.0452679	6.50276	4.99632e-10	4.38019e-07
rs2781375	cg00302379	-0.0225873	-6.49298	5.27746e-10	4.61853e-07
rs8005829	cg00302379	-0.0225228	-6.47978	5.68183e-10	4.95066e-07
rs10151162	cg00302379	-0.0226183	-6.45189	6.63874e-10	5.69626e-07
rs6662763	cg23747839	-0.0385707	-6.45108	6.66861e-10	5.69626e-07
rs4658148	cg23747839	-0.0385707	-6.45108	6.66861e-10	5.69626e-07
rs11804939	cg23747839	-0.0385707	-6.45108	6.66861e-10	5.69626e-07
rs10922617	cg23747839	-0.0385707	-6.45108	6.66861e-10	5.69626e-07
rs10801729	cg23747839	-0.0385707	-6.45108	6.66861e-10	5.69626e-07
rs1957948	cg00302379	-0.0226151	-6.45067	6.68402e-10	5.69626e-07
rs942626	cg00302379	-0.0226151	-6.45067	6.68402e-10	5.69626e-07
rs7159443	cg00302379	-0.0226151	-6.45067	6.68402e-10	5.69626e-07
rs8010213	cg00302379	-0.0226151	-6.45067	6.68402e-10	5.69626e-07
rs1998688	cg00302379	-0.0226151	-6.45067	6.68402e-10	5.69626e-07
rs1256417	cg00302379	-0.0226151	-6.45067	6.68402e-10	5.69626e-07
rs1124752	cg00302379	-0.0226151	-6.45067	6.68402e-10	5.69626e-07
rs2781373	cg00302379	-0.0226147	-6.45061	6.68626e-10	5.69626e-07
rs2781374	cg00302379	-0.0226147	-6.45061	6.68626e-10	5.69626e-07
rs1953232	cg00302379	-0.0226147	-6.45061	6.68626e-10	5.69626e-07
rs2763888	cg00302379	-0.0226147	-6.45061	6.68626e-10	5.69626e-07
rs35410051	cg00302379	-0.0227149	-6.44211	7.01041e-10	5.94192e-07
rs56413023	cg06726471	0.0371545	6.4365	7.23285e-10	6.12525e-07
rs1270074	cg00302379	-0.0227637	-6.4198	7.93656e-10	6.70409e-07
rs4902360	cg00302379	-0.0227538	-6.41606	8.10282e-10	6.83294e-07
rs1271582	cg00302379	-0.0227538	-6.41606	8.10282e-10	6.83294e-07
rs35520739	cg00302379	-0.0224738	-6.41291	8.24609e-10	6.94238e-07
rs2151755	cg00302379	-0.0224699	-6.41285	8.24877e-10	6.94238e-07
rs942628	cg00302379	-0.0225878	-6.41191	8.29179e-10	6.96869e-07
rs942629	cg00302379	-0.0222796	-6.4018	8.76993e-10	7.31498e-07
rs34346314	cg19750024	-0.0293647	-6.38999	9.36304e-10	7.76418e-07
rs571462992;rs1270073	cg00302379	-0.0224542	-6.38963	9.38213e-10	7.77354e-07
rs1124751	cg00302379	0.0223054	6.37453	1.01994e-09	8.42261e-07
rs34459643	cg00302379	0.0220465	6.3702	1.04467e-09	8.61973e-07
rs2877263	cg06726471	0.0368872	6.36222	1.09173e-09	8.98568e-07
rs4344319	cg23747839	-0.0378973	-6.29895	1.54657e-09	1.23023e-06
rs4902363	cg00302379	0.0205328	6.2774	1.74046e-09	1.36807e-06
rs11623603	cg00302379	0.0205328	6.2774	1.74046e-09	1.36807e-06
rs2411994	cg00302379	-0.0217031	-6.24902	2.03242e-09	1.57641e-06
rs928655	cg23747839	-0.037068	-6.23393	2.20674e-09	1.69446e-06
rs9997069	cg27569037	0.0384362	6.11343	4.23703e-09	3.07784e-06
rs7729980	cg06726471	0.0353731	6.01219	7.28166e-09	5.07836e-06
rs2963959	cg06726471	0.0353563	6.00914	7.40099e-09	5.15798e-06
rs7146939	cg00302379	-0.0207827	-5.98543	8.39377e-09	5.81326e-06
rs7160656	cg00302379	-0.0206596	-5.95819	9.69598e-09	6.6407e-06
rs11939388	cg27569037	0.037429	5.94526	1.03813e-08	7.0476e-06
rs4076873	cg19750024	-0.0272773	-5.93066	1.12121e-08	7.54986e-06
rs11158577	cg00302379	0.0191247	5.90697	1.27009e-08	8.39352e-06
rs11727868	cg27569037	0.036892	5.79008	2.33777e-08	1.43806e-05
rs7254312	cg05840754	-0.0630524	-5.67295	4.27203e-08	2.46785e-05
rs114578504	cg05840754	-0.0630524	-5.67295	4.27203e-08	2.46785e-05
rs45604339	cg00302379	0.0207725	5.62077	5.57265e-08	3.14619e-05
rs2898863	cg00302379	0.0199107	5.58276	6.7559e-08	3.78845e-05
rs10404014	cg25690897	-0.0366898	-5.57228	7.12341e-08	3.98556e-05
rs8004805	cg00302379	0.0190985	5.54325	8.24504e-08	4.56439e-05
rs11626156	cg00302379	0.0194123	5.53709	8.50411e-08	4.69737e-05
rs4902361	cg00302379	0.0198042	5.53372	8.64948e-08	4.76709e-05
rs868814	cg00302379	0.0193285	5.51237	9.62714e-08	5.26802e-05
rs7144259	cg00302379	0.0212711	5.51006	9.73922e-08	5.31475e-05
rs7222776	cg10241823	0.0314579	5.50936	9.77326e-08	5.33041e-05
rs58363746	cg23470227	-0.032763	-5.50445	1.00167e-07	5.45423e-05
rs762810	cg00302379	0.0203925	5.48923	1.08085e-07	5.79664e-05
rs4902364	cg00302379	0.0190492	5.45334	1.29245e-07	6.79247e-05
rs8015330	cg00302379	0.0190492	5.45334	1.29245e-07	6.79247e-05
rs11627859	cg00302379	0.0190492	5.45334	1.29245e-07	6.79247e-05
rs6911766	cg20406979	-0.0347824	-5.43118	1.44269e-07	7.52643e-05
rs8009396	cg00302379	0.0195223	5.38216	1.83806e-07	9.37782e-05
rs8009714	cg00302379	0.0193522	5.33871	2.27516e-07	0.000114264
rs884683	cg00302379	0.0193522	5.33871	2.27516e-07	0.000114264
rs12147959	cg00302379	0.0193522	5.33871	2.27516e-07	0.000114264
rs12880781	cg00302379	0.0193522	5.33871	2.27516e-07	0.000114264
rs35769504	cg00302379	0.0193522	5.33871	2.27516e-07	0.000114264
rs11158572	cg00302379	0.0193522	5.33871	2.27516e-07	0.000114264
rs12888794	cg00302379	0.0193522	5.33871	2.27516e-07	0.000114264
rs11625045	cg00302379	0.019338	5.33697	2.29462e-07	0.000114894
rs942627	cg00302379	0.019338	5.33697	2.29462e-07	0.000114894
rs55658675	cg00302379	0.019338	5.33697	2.29462e-07	0.000114894
rs8181939	cg00302379	0.019338	5.33697	2.29462e-07	0.000114894
rs7161394	cg00302379	0.019338	5.33697	2.29462e-07	0.000114894
rs1953228	cg00302379	0.0193329	5.32393	2.44572e-07	0.000122091
rs11158574	cg00302379	0.019347	5.31199	2.59255e-07	0.000129033
rs4902358	cg00302379	0.0192952	5.30725	2.65321e-07	0.000131527
rs7154852	cg00302379	0.0192477	5.30214	2.72003e-07	0.000134638
rs57538580	cg05840754	-0.059857	-5.29099	2.87174e-07	0.000141584
rs7252216	cg05840754	-0.059857	-5.29099	2.87174e-07	0.000141584
rs71509379;rs73225875;rs372753305;rs777970614	cg19750024	-0.0261473	-5.27243	3.14281e-07	0.000153806
rs11158573	cg00302379	0.0185801	5.21485	4.1513e-07	0.000197249
rs7143495	cg00302379	0.0189945	5.21462	4.15576e-07	0.000197367
rs7220191	cg18942579	-0.0486618	-5.16895	5.17399e-07	0.000239556
rs8181937	cg00302379	0.0188828	5.15196	5.61159e-07	0.000255657
rs8181938	cg00302379	0.0188828	5.15196	5.61159e-07	0.000255657
rs2034947	cg23470227	-0.0298881	-5.12766	6.30016e-07	0.00028086
rs11870254	cg17067935	0.0270365	5.10344	7.06797e-07	0.000309955
rs9906971	cg23470227	-0.0300593	-5.10168	7.12712e-07	0.000312137
rs4588035	cg23470227	-0.0300593	-5.10168	7.12712e-07	0.000312137
rs12103594	cg23470227	-0.0300593	-5.10168	7.12712e-07	0.000312137
rs7225024	cg18942579	-0.0450665	-5.10006	7.18213e-07	0.000314269
rs405553	cg15706657	0.0264781	5.08904	7.5665e-07	0.000328205
rs4902365	cg00302379	0.017306	5.08287	7.79031e-07	0.000336886
rs11867315	cg23470227	-0.0297252	-5.07694	8.01185e-07	0.000345315
rs11880318	cg05840754	-0.0579092	-5.07683	8.01586e-07	0.000345315
rs9894009	cg23470227	-0.0300363	-5.06956	8.29581e-07	0.000355906
rs11870121	cg23470227	-0.0297682	-5.05618	8.83549e-07	0.00037524
rs11870142	cg23470227	-0.0297682	-5.05618	8.83549e-07	0.00037524
rs55699990	cg23470227	-0.0297682	-5.05618	8.83549e-07	0.00037524
rs443570	cg15706657	0.0261501	5.05473	8.89606e-07	0.00037749
rs150108	cg20406979	-0.032339	-5.046	9.26896e-07	0.000382098
rs1819333	cg15706657	0.0260916	5.04441	9.33842e-07	0.000382098
rs2013815	cg15706657	0.0260916	5.04441	9.33842e-07	0.000382098
rs2769349	cg15706657	0.0260916	5.04441	9.33842e-07	0.000382098
rs1187530	cg15706657	0.0260916	5.04441	9.33842e-07	0.000382098
rs2757050	cg15706657	0.0260916	5.04441	9.33842e-07	0.000382098
rs1590257	cg15706657	0.0260916	5.04441	9.33842e-07	0.000382098
rs2769351	cg15706657	0.0260916	5.04441	9.33842e-07	0.000382098
rs6939196	cg15706657	0.0260916	5.04441	9.33842e-07	0.000382098
rs2769354	cg15706657	0.0260916	5.04441	9.33842e-07	0.000382098
rs2757052	cg15706657	0.0260916	5.04441	9.33842e-07	0.000382098
rs1211447	cg15706657	0.0260916	5.04441	9.33842e-07	0.000382098
rs1187532	cg15706657	0.0260916	5.04441	9.33842e-07	0.000382098
rs434093	cg15706657	0.0260916	5.04441	9.33842e-07	0.000382098
rs448060	cg15706657	0.0260916	5.04441	9.33842e-07	0.000382098
rs365189	cg15706657	0.0260916	5.04441	9.33842e-07	0.000382098
rs376551	cg15706657	0.0260916	5.04441	9.33842e-07	0.000382098
rs386548	cg15706657	0.0260916	5.04441	9.33842e-07	0.000382098
rs402749	cg15706657	0.0260916	5.04441	9.33842e-07	0.000382098
rs385863	cg15706657	0.0260916	5.04441	9.33842e-07	0.000382098
rs397713	cg15706657	0.0260916	5.04441	9.33842e-07	0.000382098
rs453184	cg15706657	0.0260916	5.04441	9.33842e-07	0.000382098
rs436707	cg15706657	0.0260916	5.04441	9.33842e-07	0.000382098
rs442298	cg15706657	0.0260916	5.04441	9.33842e-07	0.000382098
rs377753	cg15706657	0.0260916	5.04441	9.33842e-07	0.000382098
rs430477	cg15706657	0.0260916	5.04441	9.33842e-07	0.000382098
rs376574	cg15706657	0.0260916	5.04441	9.33842e-07	0.000382098
rs439237	cg15706657	0.0260916	5.04441	9.33842e-07	0.000382098
rs9457247	cg15706657	0.0260916	5.04441	9.33842e-07	0.000382098
rs9459827	cg15706657	0.0260916	5.04441	9.33842e-07	0.000382098
rs1794699	cg15706657	0.0260916	5.04441	9.33842e-07	0.000382098
rs1743439	cg15706657	0.0260916	5.04441	9.33842e-07	0.000382098
rs13192426	cg15706657	0.0260916	5.04441	9.33842e-07	0.000382098
rs13192687	cg15706657	0.0260916	5.04441	9.33842e-07	0.000382098
rs9717548	cg15706657	0.0260916	5.04441	9.33842e-07	0.000382098
rs5020533	cg15706657	0.0260916	5.04441	9.33842e-07	0.000382098
rs1620933	cg15706657	0.0260916	5.04441	9.33842e-07	0.000382098
rs415987	cg15706657	0.0260916	5.04441	9.33842e-07	0.000382098
rs1794697	cg15706657	0.0260916	5.04441	9.33842e-07	0.000382098
rs34560498;rs386708543	cg15706657	0.0260916	5.04441	9.33842e-07	0.000382098
rs414437	cg15706657	0.0260916	5.04441	9.33842e-07	0.000382098
rs421214	cg15706657	0.0260916	5.04441	9.33842e-07	0.000382098
rs422094	cg15706657	0.0260916	5.04441	9.33842e-07	0.000382098
rs393558	cg15706657	0.0260916	5.04441	9.33842e-07	0.000382098
rs436625	cg15706657	0.0260916	5.04441	9.33842e-07	0.000382098
rs408040	cg15706657	0.0260916	5.04441	9.33842e-07	0.000382098
rs408918	cg15706657	0.0260916	5.04441	9.33842e-07	0.000382098
rs413232	cg15706657	0.0260916	5.04441	9.33842e-07	0.000382098
rs86755	cg15706657	0.0260916	5.04441	9.33842e-07	0.000382098
rs382009	cg15706657	0.0260916	5.04441	9.33842e-07	0.000382098
rs428805	cg15706657	0.0260916	5.04441	9.33842e-07	0.000382098
rs2345571	cg15706657	0.0260916	5.04441	9.33842e-07	0.000382098
rs385460	cg15706657	0.0260916	5.04441	9.33842e-07	0.000382098
rs385113	cg15706657	0.0260916	5.04441	9.33842e-07	0.000382098
rs932644	cg15706657	0.0260916	5.04441	9.33842e-07	0.000382098
rs10946198	cg15706657	0.0260916	5.04441	9.33842e-07	0.000382098
rs1743440	cg15706657	0.0260916	5.04441	9.33842e-07	0.000382098
rs1743441	cg15706657	0.0260916	5.04441	9.33842e-07	0.000382098
rs1794694	cg15706657	0.0260916	5.04441	9.33842e-07	0.000382098
rs430293	cg15706657	0.0260916	5.04441	9.33842e-07	0.000382098
rs430097	cg15706657	0.0260916	5.04441	9.33842e-07	0.000382098
rs409356	cg15706657	0.0260916	5.04441	9.33842e-07	0.000382098
rs447042	cg15706657	0.0260916	5.04441	9.33842e-07	0.000382098
rs402191	cg15706657	0.0260916	5.04441	9.33842e-07	0.000382098
rs1794693	cg15706657	0.0260916	5.04441	9.33842e-07	0.000382098
rs401260	cg15706657	0.0260916	5.04441	9.33842e-07	0.000382098
rs422694	cg15706657	0.0260916	5.04441	9.33842e-07	0.000382098
rs422780	cg15706657	0.0260916	5.04441	9.33842e-07	0.000382098
rs400176	cg15706657	0.0260916	5.04441	9.33842e-07	0.000382098
rs422562	cg15706657	0.0260916	5.04441	9.33842e-07	0.000382098
rs416131	cg15706657	0.0260916	5.04441	9.33842e-07	0.000382098
rs415890	cg15706657	0.0260916	5.04441	9.33842e-07	0.000382098
rs415842	cg15706657	0.0260916	5.04441	9.33842e-07	0.000382098
rs389956	cg15706657	0.0260916	5.04441	9.33842e-07	0.000382098
rs389946	cg15706657	0.0260916	5.04441	9.33842e-07	0.000382098
rs394522	cg15706657	0.0260893	5.04385	9.36318e-07	0.000382639
rs10946199	cg15706657	0.0260871	5.04356	9.3756e-07	0.000382989
rs366938	cg15706657	0.0260773	5.04156	9.46403e-07	0.000386285
rs1811121	cg15706657	0.0260773	5.04156	9.46403e-07	0.000386285
rs401261	cg15706657	0.0260738	5.04011	9.52875e-07	0.00038829
rs35002541	cg00302379	0.017158	5.03708	9.66565e-07	0.000393065
rs35176994	cg00302379	0.0180681	5.0347	9.77377e-07	0.000396388
rs387733	cg15706657	0.0263533	5.02866	1.00548e-06	0.000406069
rs7221815	cg18942579	-0.0488437	-5.02578	1.01914e-06	0.000410755
rs8077660	cg10241823	0.036022	5.02446	1.02548e-06	0.000411961
rs936391	cg23470227	-0.0295767	-5.02304	1.03231e-06	0.000412062
rs56098714	cg23470227	-0.0295848	-5.02272	1.03388e-06	0.000412523
rs796727789;rs9303411;rs34450066	cg18942579	-0.0468723	-5.02025	1.04588e-06	0.000416974
rs4968388	cg18942579	-0.0473396	-5.00946	1.10003e-06	0.000434047
rs2136694	cg18942579	-0.0473396	-5.00946	1.10003e-06	0.000434047
rs7215807	cg18942579	-0.0473396	-5.00946	1.10003e-06	0.000434047
rs2333559	cg18942579	-0.0473396	-5.00946	1.10003e-06	0.000434047
rs6503933	cg18942579	-0.0473396	-5.00946	1.10003e-06	0.000434047
rs12468313	cg09494379	-0.0248389	-5.00377	1.12972e-06	0.000444177
rs10853015	cg18942579	-0.0439261	-4.99334	1.18606e-06	0.000460513
rs55992471	cg23470227	-0.0295727	-4.98952	1.20736e-06	0.000468236
rs2015864	cg15706657	0.0258492	4.98571	1.22902e-06	0.000475708
rs8070773	cg18942579	-0.0473117	-4.98353	1.24153e-06	0.000477398
rs11158575	cg00302379	0.0181299	4.97389	1.2985e-06	0.000497764
rs4710147	cg15706657	0.0258465	4.97073	1.31771e-06	0.000503579
rs2757046	cg15706657	0.0258465	4.97073	1.31771e-06	0.000503579
rs2757047	cg15706657	0.0258465	4.97073	1.31771e-06	0.000503579
rs4968335	cg18942579	-0.0472224	-4.96734	1.33869e-06	0.000510851
rs12887607	cg00302379	0.0179118	4.96684	1.34174e-06	0.000511389
rs1358535	cg18942579	-0.0471019	-4.95031	1.44874e-06	0.000547769
rs12449896	cg18942579	-0.0482989	-4.94366	1.49403e-06	0.000562754
rs2877976	cg18942579	-0.0482989	-4.94366	1.49403e-06	0.000562754
rs7040552	cg20745272	0.0153	4.9243	1.63393e-06	0.00060539
rs1811123	cg15706657	0.0255861	4.91898	1.67457e-06	0.000617903
rs393727	cg15706657	0.0253827	4.91672	1.69211e-06	0.000623454
rs4572466	cg23470227	-0.0291648	-4.91543	1.70222e-06	0.000626715
rs7223290	cg18942579	-0.0479148	-4.90847	1.75772e-06	0.000644054
rs1973842	cg18942579	-0.0466141	-4.9059	1.77857e-06	0.000649543
rs7220146	cg18942579	-0.0466141	-4.9059	1.77857e-06	0.000649543
rs1463485	cg23470227	-0.0290398	-4.89113	1.90357e-06	0.000689129
rs2063354	cg18942579	-0.0465319	-4.88813	1.93002e-06	0.000697689
rs8078623	cg18942579	-0.0478718	-4.88605	1.94857e-06	0.000702354
rs7359648	cg18942579	-0.0478718	-4.88605	1.94857e-06	0.000702354
rs8075664	cg18942579	-0.0478718	-4.88605	1.94857e-06	0.000702354
rs3744381	cg18942579	-0.0478718	-4.88605	1.94857e-06	0.000702354
rs8070132	cg18942579	-0.0478718	-4.88605	1.94857e-06	0.000702354
rs907065	cg18942579	-0.047705	-4.8856	1.95257e-06	0.00070354
rs34130073	cg18942579	-0.0510607	-4.86837	2.11298e-06	0.00075696
rs9303412	cg18942579	-0.0454031	-4.81482	2.69732e-06	0.000914953
rs9910530	cg18942579	-0.046069	-4.8117	2.73582e-06	0.000925174
rs3094626	cg16586538	-0.0247735	-4.8009	2.87309e-06	0.000963418
rs8078749	cg18942579	-0.0454906	-4.79414	2.96242e-06	0.000987719
rs8079033	cg18942579	-0.0454906	-4.79414	2.96242e-06	0.000987719
rs10221193	cg18942579	-0.0454906	-4.79414	2.96242e-06	0.000987719
rs9903268	cg18942579	-0.0454906	-4.79414	2.96242e-06	0.000987719
rs56369272	cg18942579	-0.0454906	-4.79414	2.96242e-06	0.000987719
rs4433858	cg18942579	-0.0454906	-4.79414	2.96242e-06	0.000987719
rs11079384	cg18942579	-0.0454906	-4.79414	2.96242e-06	0.000987719
rs16943700	cg18942579	-0.0454055	-4.77973	3.16181e-06	0.00104441
rs1528490	cg18942579	-0.0454055	-4.77973	3.16181e-06	0.00104441
rs11650152	cg18942579	-0.0454055	-4.77973	3.16181e-06	0.00104441
rs407515	cg15706657	0.0249743	4.75692	3.50424e-06	0.00113789
rs406095	cg15706657	0.0249743	4.75692	3.50424e-06	0.00113789
rs4710160	cg15706657	0.0249743	4.75692	3.50424e-06	0.00113789
rs4710161	cg15706657	0.0249743	4.75692	3.50424e-06	0.00113789
rs388406	cg15706657	0.0249743	4.75692	3.50424e-06	0.00113789
rs430145	cg15706657	0.0249743	4.75692	3.50424e-06	0.00113789
rs425039	cg15706657	0.0249743	4.75692	3.50424e-06	0.00113789
rs376097	cg15706657	0.0249743	4.75692	3.50424e-06	0.00113789
rs424185	cg15706657	0.0249743	4.75692	3.50424e-06	0.00113789
rs400837	cg15706657	0.0249743	4.75692	3.50424e-06	0.00113789
rs7209894	cg18942579	-0.0467324	-4.74844	3.64043e-06	0.00116991
rs1358534	cg18942579	-0.0467324	-4.74844	3.64043e-06	0.00116991
rs4782003	cg26010590	-0.0227733	-4.74746	3.65648e-06	0.00117393
rs113157445	cg18942579	-0.0496729	-4.74089	3.76596e-06	0.0012052
rs12952653	cg18942579	-0.0496729	-4.74089	3.76596e-06	0.0012052
rs7862952	cg20745272	0.01489	4.72135	4.11066e-06	0.00128173
rs9893154	cg18942579	-0.0464612	-4.71938	4.14697e-06	0.00129144
rs62081787	cg18942579	-0.0495963	-4.70993	4.32594e-06	0.00133922
rs1881441	cg18942579	-0.0448361	-4.70591	4.40426e-06	0.00136051
rs2333554	cg18942579	-0.0448361	-4.70591	4.40426e-06	0.00136051
rs1528492	cg18942579	-0.0469628	-4.70199	4.48199e-06	0.00138151
rs8078458	cg12582317	-0.0344393	-4.70133	4.49528e-06	0.00138518
rs8078719	cg12582317	-0.0344215	-4.69937	4.53476e-06	0.00139605
rs9911131	cg18942579	-0.0459292	-4.69108	4.70531e-06	0.00143437
rs12450295	cg18942579	-0.0459292	-4.69108	4.70531e-06	0.00143437
rs62084481	cg18942579	-0.0459292	-4.69108	4.70531e-06	0.00143437
rs7214576	cg18942579	-0.0447343	-4.6892	4.74492e-06	0.00144423
rs1573939	cg18942579	-0.0447343	-4.6892	4.74492e-06	0.00144423
rs6503930	cg18942579	-0.0458524	-4.67826	4.98163e-06	0.00150799
rs1179625	cg18017575	-0.0220752	-4.67275	5.10505e-06	0.00154113
rs80244055	cg10241823	0.0327568	4.67071	5.15146e-06	0.00155373
rs2345573	cg15706657	0.0244109	4.65614	5.49526e-06	0.00164497
rs12946042	cg10241823	0.0332277	4.64929	5.66428e-06	0.00169302
rs4997107	cg15706657	0.0244567	4.64815	5.69303e-06	0.00170059
rs1510286	cg18942579	-0.045941	-4.64404	5.79739e-06	0.00172865
rs2034946	cg23470227	-0.0282756	-4.61377	6.62491e-06	0.00192469
rs7501749;rs201912115;rs386796919	cg17067935	-0.025115	-4.60118	7.00177e-06	0.00202296
rs2149083	cg15706657	0.0237271	4.55424	8.59685e-06	0.00242541
rs2149084	cg15706657	0.0237271	4.55424	8.59685e-06	0.00242541
rs2769346	cg15706657	0.0237271	4.55424	8.59685e-06	0.00242541
rs2149085	cg15706657	0.0237271	4.55424	8.59685e-06	0.00242541
rs2769347	cg15706657	0.0237271	4.55424	8.59685e-06	0.00242541
rs2769348	cg15706657	0.0237271	4.55424	8.59685e-06	0.00242541
rs2149090	cg15706657	0.0237271	4.55424	8.59685e-06	0.00242541
rs2149091	cg15706657	0.0237271	4.55424	8.59685e-06	0.00242541
rs2149092	cg15706657	0.0237271	4.55424	8.59685e-06	0.00242541
rs6498687	cg26010590	0.024587	4.54204	9.06556e-06	0.00254109
rs67043925	cg18942579	-0.0484851	-4.52122	9.92283e-06	0.0027466
rs4793899	cg12582317	-0.0331425	-4.51907	1.00154e-05	0.00276761
rs112911630	cg18942579	-0.048876	-4.50143	1.0809e-05	0.00295168
rs9894383	cg23470227	-0.0280798	-4.49704	1.10159e-05	0.00300242
rs3130106	cg16586538	0.022836	4.44778	1.36125e-05	0.00358821
rs9261700	cg16586538	0.0228353	4.44769	1.36174e-05	0.00358821
rs75602142	cg10241823	0.0308425	4.41616	1.55785e-05	0.00404783
rs3130136	cg16586538	-0.0229609	-4.40736	1.61724e-05	0.00418781
rs3130358	cg16586538	0.0226553	4.39354	1.71491e-05	0.00440862
rs3130359	cg16586538	0.0226553	4.39354	1.71491e-05	0.00440862
rs3132623	cg16586538	0.0226553	4.39354	1.71491e-05	0.00440862
rs3094706	cg16586538	0.0226553	4.39354	1.71491e-05	0.00440862
rs3130142	cg16586538	0.0226541	4.39334	1.71633e-05	0.00441114
rs3132644	cg16586538	0.0228205	4.39231	1.72386e-05	0.004422
rs11265301	cg08912361	-0.0330345	-4.37574	1.8491e-05	0.00471104
rs3130360	cg16586538	0.0224182	4.37256	1.87405e-05	0.00472539
rs3130112	cg16586538	0.0224168	4.37198	1.87866e-05	0.00472539
rs3094702	cg16586538	0.0224162	4.37175	1.88053e-05	0.00472539
rs2078680	cg16586538	0.0224162	4.37175	1.88053e-05	0.00472539
rs3130120	cg16586538	0.022415	4.37163	1.88149e-05	0.00472539
rs3130143	cg16586538	0.0224142	4.37147	1.88276e-05	0.00472539
rs3130121	cg16586538	0.0224115	4.37088	1.88742e-05	0.00472539
rs3094711	cg16586538	0.0224115	4.37088	1.88742e-05	0.00472539
rs3130111	cg16586538	0.0224114	4.37079	1.88816e-05	0.00472539
rs3130138	cg16586538	0.0224098	4.3704	1.89125e-05	0.00472539
rs3094705	cg16586538	0.0224098	4.3704	1.89125e-05	0.00472539
rs3094048	cg16586538	0.0224077	4.37004	1.89412e-05	0.00472539
rs9261675	cg16586538	0.0224062	4.36989	1.89533e-05	0.00472539
rs3129819	cg16586538	0.0224058	4.3698	1.89606e-05	0.00472539
rs2394818	cg16586538	0.0224048	4.3695	1.89844e-05	0.00472539
rs3132643	cg16586538	0.0224053	4.36949	1.89854e-05	0.00472539
rs3132642	cg16586538	0.0224053	4.36949	1.89854e-05	0.00472539
rs3132639	cg16586538	0.0224053	4.36949	1.89854e-05	0.00472539
rs3129816	cg16586538	0.0224053	4.36949	1.89854e-05	0.00472539
rs3130368	cg16586538	0.0224053	4.36949	1.89854e-05	0.00472539
rs3132635	cg16586538	0.0224053	4.36949	1.89854e-05	0.00472539
rs3130369	cg16586538	0.0224053	4.36949	1.89854e-05	0.00472539
rs3132633	cg16586538	0.0224053	4.36949	1.89854e-05	0.00472539
rs3094062	cg16586538	0.0224053	4.36949	1.89854e-05	0.00472539
rs1419653	cg16586538	0.0224053	4.36949	1.89854e-05	0.00472539
rs1419652	cg16586538	0.0224053	4.36949	1.89854e-05	0.00472539
rs3132629	cg16586538	0.0224053	4.36949	1.89854e-05	0.00472539
rs3130373	cg16586538	0.0224053	4.36949	1.89854e-05	0.00472539
rs3132628	cg16586538	0.0224053	4.36949	1.89854e-05	0.00472539
rs3132626	cg16586538	0.0224053	4.36949	1.89854e-05	0.00472539
rs970269	cg16586538	0.0224053	4.36949	1.89854e-05	0.00472539
rs796991848;rs3132624	cg16586538	0.0224053	4.36949	1.89854e-05	0.00472539
rs3129827	cg16586538	0.0224053	4.36949	1.89854e-05	0.00472539
rs3129828	cg16586538	0.0224053	4.36949	1.89854e-05	0.00472539
rs3132622	cg16586538	0.0224053	4.36949	1.89854e-05	0.00472539
rs3094623	cg16586538	0.0224053	4.36949	1.89854e-05	0.00472539
rs3132621	cg16586538	0.0224053	4.36949	1.89854e-05	0.00472539
rs3132620;rs386698734;rs200933328	cg16586538	0.0224053	4.36949	1.89854e-05	0.00472539
rs386698734;rs3094033	cg16586538	0.0224053	4.36949	1.89854e-05	0.00472539
rs3130133	cg16586538	0.0224053	4.36949	1.89854e-05	0.00472539
rs3094714	cg16586538	0.0224053	4.36949	1.89854e-05	0.00472539
rs2394819	cg16586538	0.0224053	4.36949	1.89854e-05	0.00472539
rs3130122	cg16586538	0.0224053	4.36949	1.89854e-05	0.00472539
rs3094052	cg16586538	0.0224053	4.36949	1.89854e-05	0.00472539
rs3130139	cg16586538	0.0224053	4.36949	1.89854e-05	0.00472539
rs3094051	cg16586538	0.0224053	4.36949	1.89854e-05	0.00472539
rs3130144	cg16586538	0.0224053	4.36949	1.89854e-05	0.00472539
rs9261736;rs201050133	cg16586538	0.0224053	4.36949	1.89854e-05	0.00472539
rs3094701	cg16586538	0.0224053	4.36949	1.89854e-05	0.00472539
rs3094047	cg16586538	0.0224053	4.36949	1.89854e-05	0.00472539
rs3094698	cg16586538	0.0224053	4.36949	1.89854e-05	0.00472539
rs3094697	cg16586538	0.0224053	4.36949	1.89854e-05	0.00472539
rs3094042	cg16586538	0.0224053	4.36949	1.89854e-05	0.00472539
rs3094041	cg16586538	0.0224053	4.36949	1.89854e-05	0.00472539
rs3094040	cg16586538	0.0224053	4.36949	1.89854e-05	0.00472539
rs3130107	cg16586538	0.0224053	4.36949	1.89854e-05	0.00472539
rs3094038	cg16586538	0.0224053	4.36949	1.89854e-05	0.00472539
rs3130109	cg16586538	0.0224053	4.36949	1.89854e-05	0.00472539
rs3130110	cg16586538	0.0224053	4.36949	1.89854e-05	0.00472539
rs3130113	cg16586538	0.0224053	4.36949	1.89854e-05	0.00472539
rs3130115	cg16586538	0.0224053	4.36949	1.89854e-05	0.00472539
rs3130108	cg16586538	0.0224045	4.36942	1.89909e-05	0.00472539
rs3129825	cg16586538	0.022404	4.3693	1.90008e-05	0.00472539
rs3129826	cg16586538	0.0224032	4.36905	1.90209e-05	0.00472539
rs3094037	cg16586538	0.0224027	4.36901	1.90241e-05	0.00472539
rs2394820	cg16586538	0.0224029	4.36889	1.90332e-05	0.00472539
rs3094045	cg16586538	0.0224027	4.36881	1.90396e-05	0.00472539
rs3094044	cg16586538	0.0224027	4.36881	1.90396e-05	0.00472539
rs3094043	cg16586538	0.0224027	4.36881	1.90396e-05	0.00472539
rs2078679	cg16586538	0.0223996	4.36878	1.90426e-05	0.00472539
rs2078678	cg16586538	0.0223996	4.36878	1.90426e-05	0.00472539
rs3094028	cg16586538	0.0223996	4.36878	1.90426e-05	0.00472539
rs3130131	cg16586538	0.0223996	4.36878	1.90426e-05	0.00472539
rs3094709	cg16586538	0.0223996	4.36878	1.90426e-05	0.00472539
rs6939275	cg16586538	0.0223996	4.36878	1.90426e-05	0.00472539
rs3094027	cg16586538	0.0223996	4.36878	1.90426e-05	0.00472539
rs3094707	cg16586538	0.0223996	4.36878	1.90426e-05	0.00472539
rs3094700	cg16586538	0.0224018	4.36876	1.90439e-05	0.00472539
rs3094046	cg16586538	0.0224018	4.36876	1.90439e-05	0.00472539
rs3130105	cg16586538	0.0224018	4.36876	1.90439e-05	0.00472539
rs3094699	cg16586538	0.0224018	4.36876	1.90439e-05	0.00472539
rs1419654	cg16586538	0.0223997	4.36874	1.90456e-05	0.00472539
rs3132632	cg16586538	0.0224004	4.36861	1.90556e-05	0.00472671
rs3094696	cg16586538	0.0224001	4.36839	1.90736e-05	0.00472834
rs1072315	cg16586538	0.0223978	4.36833	1.90787e-05	0.00472834
rs3130124	cg16586538	0.022397	4.36818	1.90901e-05	0.00472834
rs9261710	cg16586538	0.022397	4.36818	1.90901e-05	0.00472834
rs3094710	cg16586538	0.022397	4.36818	1.90901e-05	0.00472834
rs3094695	cg16586538	0.0223992	4.36814	1.90934e-05	0.00472834
rs3130371	cg16586538	0.0223991	4.36812	1.90954e-05	0.00472834
rs3130366	cg16586538	0.0223943	4.36762	1.91355e-05	0.00473592
rs2757044	cg15706657	0.0229212	4.36644	1.9231e-05	0.00475717
rs3129814	cg16586538	0.0223906	4.36624	1.92475e-05	0.00476007
rs3132641	cg16586538	0.0223874	4.36556	1.93028e-05	0.00476996
rs3130362	cg16586538	0.0223861	4.36538	1.93171e-05	0.00477019
rs3132640	cg16586538	0.0226332	4.3637	1.94546e-05	0.00479936
rs3094715	cg16586538	0.0223659	4.3611	1.9669e-05	0.00484266
rs3094039	cg16586538	0.0224518	4.35141	2.04883e-05	0.00501952
rs8071160	cg10241823	0.0304739	4.33807	2.16697e-05	0.00522927
rs7212635	cg23470227	-0.0338661	-4.33466	2.19821e-05	0.00528943
rs3129824	cg16586538	0.022197	4.30488	2.48998e-05	0.00588552
rs8052768	cg26010590	-0.0206901	-4.27895	2.77383e-05	0.0064244
rs970267	cg16586538	0.0219868	4.27599	2.80815e-05	0.00649386
rs3130114	cg16586538	0.0218982	4.25696	3.03857e-05	0.00695987
rs2108609	cg12582317	-0.0305497	-4.24636	3.17469e-05	0.00720044
rs7205461	cg26010590	-0.020428	-4.23869	3.27672e-05	0.00739984
rs6503936	cg18942579	-0.046665	-4.20793	3.71874e-05	0.00826314
rs4405675	cg25690897	-0.0261539	-4.20166	3.81555e-05	0.00843799
rs3129813	cg16586538	-0.0215234	-4.1926	3.95961e-05	0.00864977
rs9303396	cg12229367	-0.0174094	-4.17957	4.17619e-05	0.00907114
rs35252817;rs3130357	cg16586538	-0.0214312	-4.1765	4.22871e-05	0.00916126
rs1537012	cg08562586	-0.0256599	-4.12657	5.17891e-05	0.0109159
rs2840591	cg08912361	-0.0301707	-4.12097	5.29734e-05	0.0111137
rs57287238	cg23470227	-0.0256457	-4.11054	5.52484e-05	0.0115086
rs936394	cg23470227	-0.0256457	-4.11054	5.52484e-05	0.0115086
rs6503921	cg18942579	-0.0359164	-4.10801	5.58138e-05	0.0116094
rs2789424	cg08912361	-0.0304552	-4.0943	5.89788e-05	0.0121384
rs9944404	cg12229367	-0.0171612	-4.07619	6.34197e-05	0.0128506
rs8075326	cg12229367	-0.0171286	-4.07453	6.38426e-05	0.0129284
rs8076475	cg12229367	-0.0171388	-4.07191	6.45145e-05	0.0130459
rs3871596	cg12229367	-0.0171388	-4.07191	6.45145e-05	0.0130459
rs3883322	cg12229367	-0.0171388	-4.07191	6.45145e-05	0.0130459
rs4793565	cg12229367	-0.0171665	-4.07013	6.49742e-05	0.0131326
rs10759243	cg20745272	0.012394	4.06523	6.62611e-05	0.0133062
rs10759242	cg20745272	0.0124327	4.06294	6.68679e-05	0.013402
rs781384624;rs778454590;rs4239541	cg14242207	0.0155843	4.06154	6.72437e-05	0.0134665
rs1989947	cg18942579	-0.0350946	-4.05133	7.00375e-05	0.0139978
rs8076752	cg18942579	-0.035341	-4.04568	7.1632e-05	0.0142907
rs7226361	cg18942579	-0.0353554	-4.04426	7.20375e-05	0.0143601
rs8067868	cg12229367	-0.0169078	-4.03791	7.38798e-05	0.0146862
rs11868584	cg18942579	-0.0352794	-4.03645	7.43098e-05	0.0147393
rs9898641	cg18942579	-0.0351782	-4.025	7.77631e-05	0.0152963
rs11881113	cg25690897	-0.0250646	-4.02478	7.78301e-05	0.0153035
rs9905339	cg12229367	-0.0167284	-4.01915	7.95864e-05	0.0156026
rs8078987	cg18942579	-0.0388879	-4.01879	7.97006e-05	0.0156065
rs8078424	cg18942579	-0.0388879	-4.01879	7.97006e-05	0.0156065
rs59426030	cg18942579	-0.0388879	-4.01879	7.97006e-05	0.0156065
rs9905543	cg18942579	-0.0388879	-4.01879	7.97006e-05	0.0156065
rs4047777	cg18942579	-0.0388879	-4.01879	7.97006e-05	0.0156065
rs8081951	cg10241823	0.0281046	4.00657	8.36447e-05	0.0162669
rs11656807	cg18942579	-0.0350559	-4.00263	8.49568e-05	0.0164487
rs73318912	cg18942579	-0.0388944	-3.9973	8.67633e-05	0.0167361
rs11867560	cg23470227	-0.0247906	-3.99502	8.75441e-05	0.0168443
rs11867582	cg23470227	-0.0247906	-3.99502	8.75441e-05	0.0168443
rs4867424	cg06726471	-0.0244956	-3.98985	8.93448e-05	0.0170952
rs1537013	cg08562586	-0.0247184	-3.98748	9.0185e-05	0.0172243
rs7023713	cg08562586	-0.0244754	-3.97465	9.48488e-05	0.0179379
rs7043308	cg08562586	-0.0245772	-3.97163	9.59793e-05	0.018107
rs2516739	cg02606535	-0.0187229	-3.96855	9.71458e-05	0.0182561
rs9916043	cg12229367	-0.0166124	-3.96369	9.90142e-05	0.0184974
rs8078458	cg12229367	-0.0156885	-3.95893	0.000100875	0.0186805
rs8078719	cg12229367	-0.0156741	-3.95563	0.000102185	0.0186805
rs66584478	cg23470227	-0.0248777	-3.94726	0.000105584	0.0192341
rs3130119	cg16586538	0.0202205	3.93351	0.000111398	0.0200149
rs2225330	cg08562586	-0.0244343	-3.92853	0.000113582	0.0203158
rs56283010	cg18942579	-0.0463716	-3.92272	0.000116176	0.0207424
rs936393	cg23470227	-0.0244552	-3.91663	0.000118954	0.0210476
rs7027443	cg08562586	-0.0242789	-3.90638	0.000123777	0.0217104
rs10817706	cg08562586	-0.0242789	-3.90638	0.000123777	0.0217104
rs7048025	cg08562586	-0.0242789	-3.90638	0.000123777	0.0217104
rs7031827	cg08562586	-0.0242789	-3.90638	0.000123777	0.0217104
rs7048175	cg08562586	-0.0242789	-3.90638	0.000123777	0.0217104
rs7031990	cg08562586	-0.0242789	-3.90638	0.000123777	0.0217104
rs10982513	cg08562586	-0.0242789	-3.90638	0.000123777	0.0217104
rs2184286	cg00302379	-0.0134727	-3.9032	0.000125312	0.021914
rs4349212;rs112892642	cg18942579	-0.0432637	-3.90269	0.000125557	0.0219337
rs56901103	cg23470227	-0.024129	-3.8953	0.000129199	0.0224977
rs8064521	cg18942579	-0.0431432	-3.89216	0.000130777	0.0226924
rs4968392	cg18942579	-0.0431432	-3.89216	0.000130777	0.0226924
rs11869228	cg18942579	-0.0431432	-3.89216	0.000130777	0.0226924
rs7215464	cg18942579	-0.0340368	-3.88776	0.000133018	0.0230309
rs55830825	cg17501210	0.0301912	3.88677	0.000133527	0.0231071
rs9348104	cg17501210	0.0301912	3.88677	0.000133527	0.0231071
rs80354604	cg18942579	-0.0436604	-3.88533	0.000134267	0.023226
rs2516740	cg02606535	-0.0184664	-3.88503	0.000134422	0.0232459
rs2333508	cg18942579	-0.0342903	-3.8748	0.000139827	0.0239518
rs78340950	cg18942579	-0.0342141	-3.86933	0.000142805	0.0243613
rs2665399	cg18942579	-0.0438839	-3.84948	0.000154104	0.0258113
rs11653697	cg18942579	-0.0335131	-3.8455	0.00015647	0.0260348
rs11077797	cg23470227	-0.0308671	-3.8395	0.000160101	0.026451
rs9906773	cg18942579	-0.0340269	-3.83329	0.000163944	0.0269296
rs11064249	cg17281677	0.018623	3.82922	0.000166509	0.0272118
rs10774437	cg17281677	0.018623	3.82922	0.000166509	0.0272118
rs2777891	cg18942579	-0.0429804	-3.82886	0.000166739	0.0272404
rs6503941	cg18942579	-0.0429804	-3.82886	0.000166739	0.0272404
rs8082060	cg23470227	-0.0246476	-3.82556	0.000168853	0.0274463
rs10849488	cg17281677	0.0183685	3.8231	0.000170441	0.0276546
rs8068913	cg18942579	-0.037416	-3.82222	0.000171015	0.0277162
rs8071475	cg18942579	-0.037416	-3.82222	0.000171015	0.0277162
rs12103623	cg18942579	-0.037416	-3.82222	0.000171015	0.0277162
rs7847927	cg20745272	0.0118578	3.81449	0.000176116	0.0282989
rs9915951	cg18942579	-0.0338221	-3.81188	0.000177874	0.0284894
rs9457249	cg15706657	0.0201458	3.80882	0.000179957	0.0287628
rs9457251	cg15706657	0.0201458	3.80882	0.000179957	0.0287628
rs2250014	cg18942579	-0.0430413	-3.79466	0.000189882	0.0296451
rs1322077	cg15706657	0.0199977	3.77941	0.000201157	0.0308398
rs11712150	cg10499974	-0.02872	-3.7742	0.000205151	0.0313459
rs371192544;rs28430798;rs375276793;rs386789448	cg04986899	-0.0141118	-3.74714	0.000227129	0.0339641
rs11653576	cg18942579	-0.043617	-3.7371	0.000235831	0.0349081
rs2645469	cg18942579	-0.0420462	-3.72481	0.000246917	0.0360068
rs11586271	cg20697417	-0.0239218	-3.71396	0.000257117	0.0371833
rs7132183	cg17281677	0.018061	3.7118	0.000259195	0.0372412
rs7132298	cg17281677	0.018061	3.7118	0.000259195	0.0372412
rs113962808	cg10499974	-0.0283323	-3.71033	0.000260614	0.0373828
rs2187671	cg10499974	-0.0283323	-3.71033	0.000260614	0.0373828
rs34602794	cg10499974	-0.0283323	-3.71033	0.000260614	0.0373828
rs2777897	cg18942579	-0.0438014	-3.69299	0.000277957	0.0392265
rs9459835	cg15706657	0.0193248	3.68635	0.000284879	0.0400274
rs2665396	cg18942579	-0.0419156	-3.68405	0.000287317	0.0402735
rs6911766	cg23216724	-0.0274118	-3.67466	0.000297472	0.0410157
rs10853016	cg18942579	-0.0415857	-3.66144	0.000312336	0.0424907
rs3744017	cg23470227	-0.023403	-3.65905	0.000315101	0.042783
rs62233591	cg17435710	-0.012346	-3.65815	0.000316146	0.0428956
rs35171809	cg15706657	0.0189474	3.65797	0.000316347	0.0429171
rs2222763	cg18942579	-0.0412329	-3.64437	0.00033257	0.0446196
rs11867339	cg23470227	-0.0235881	-3.63925	0.000338872	0.0452463
rs7294323	cg17281677	0.0176437	3.63912	0.000339035	0.0452463
rs11585393	cg20697417	-0.0208788	-3.6376	0.000340929	0.0454169
rs6067341	cg00568296	0.0273007	3.63516	0.000343987	0.0457567
rs72860389	cg23470227	-0.0228426	-3.63225	0.000347679	0.0461052
rs2136695	cg18942579	-0.0429595	-3.63185	0.000348179	0.0461419
rs72838873	cg18942579	-0.0436695	-3.6276	0.000353637	0.0465985
rs11867363	cg18942579	-0.0408127	-3.60084	0.000389893	0.0497312
rs7220933	cg18942579	-0.0408127	-3.60084	0.000389893	0.0497312
rs12941732	cg12229367	-0.0149133	-3.60084	0.000389895	0.0497312
rs2742417	cg15361247	0.044537	8.67862	8.02207e-16	2.09693e-12
rs2251954	cg15361247	0.0445274	8.67617	8.15249e-16	2.11989e-12
rs2742421	cg15361247	0.0448037	8.67376	8.28283e-16	2.14817e-12
rs9877499	cg15361247	0.0446311	8.64369	1.00967e-15	2.55478e-12
rs2673035;rs142054397	cg15361247	0.0445368	8.63651	1.05855e-15	2.55478e-12
rs2742420	cg15361247	0.0445015	8.62779	1.12102e-15	2.55478e-12
rs2673051	cg15361247	0.0445015	8.62779	1.12102e-15	2.55478e-12
rs2742422	cg15361247	0.0445015	8.62779	1.12102e-15	2.55478e-12
rs2742423	cg15361247	0.0445015	8.62779	1.12102e-15	2.55478e-12
rs17328701	cg15361247	0.0445015	8.62779	1.12102e-15	2.55478e-12
rs1969624	cg15361247	0.0445015	8.62779	1.12102e-15	2.55478e-12
rs1969625	cg15361247	0.0445015	8.62779	1.12102e-15	2.55478e-12
rs1609553	cg15361247	0.0445015	8.62779	1.12102e-15	2.55478e-12
rs1609554	cg15361247	0.0445015	8.62779	1.12102e-15	2.55478e-12
rs2673058	cg15361247	0.0445015	8.62779	1.12102e-15	2.55478e-12
rs2673057	cg15361247	0.0445015	8.62779	1.12102e-15	2.55478e-12
rs2742426	cg15361247	0.0445015	8.62779	1.12102e-15	2.55478e-12
rs2742427	cg15361247	0.0445015	8.62779	1.12102e-15	2.55478e-12
rs2742429	cg15361247	0.0445015	8.62779	1.12102e-15	2.55478e-12
rs2742430	cg15361247	0.0445015	8.62779	1.12102e-15	2.55478e-12
rs2742431	cg15361247	0.0445015	8.62779	1.12102e-15	2.55478e-12
rs2742432	cg15361247	0.0445015	8.62779	1.12102e-15	2.55478e-12
rs2673056	cg15361247	0.0445015	8.62779	1.12102e-15	2.55478e-12
rs9825559	cg15361247	0.0445015	8.62779	1.12102e-15	2.55478e-12
rs9809868	cg15361247	0.0445015	8.62779	1.12102e-15	2.55478e-12
rs9829631	cg15361247	0.0445015	8.62779	1.12102e-15	2.55478e-12
rs1534875	cg15361247	0.0445015	8.62779	1.12102e-15	2.55478e-12
rs1534876	cg15361247	0.0445015	8.62779	1.12102e-15	2.55478e-12
rs2673047	cg15361247	0.0445015	8.62779	1.12102e-15	2.55478e-12
rs2742438	cg15361247	0.0445015	8.62779	1.12102e-15	2.55478e-12
rs2742439	cg15361247	0.0445015	8.62779	1.12102e-15	2.55478e-12
rs938363;rs34519783	cg15361247	0.0445015	8.62779	1.12102e-15	2.55478e-12
rs938362	cg15361247	0.0445015	8.62779	1.12102e-15	2.55478e-12
rs1969626	cg15361247	0.0445015	8.62779	1.12102e-15	2.55478e-12
rs2373047	cg15361247	0.0445015	8.62779	1.12102e-15	2.55478e-12
rs2742441	cg15361247	0.0445015	8.62779	1.12102e-15	2.55478e-12
rs2742442	cg15361247	0.0445015	8.62779	1.12102e-15	2.55478e-12
rs2673038	cg15361247	0.0445015	8.62779	1.12102e-15	2.55478e-12
rs2673037	cg15361247	0.0445015	8.62779	1.12102e-15	2.55478e-12
rs2245705	cg15361247	0.0445015	8.62779	1.12102e-15	2.55478e-12
rs1883096	cg15361247	0.0445015	8.62779	1.12102e-15	2.55478e-12
rs2673036	cg15361247	0.0445015	8.62779	1.12102e-15	2.55478e-12
rs2742445	cg15361247	0.0445015	8.62779	1.12102e-15	2.55478e-12
rs1877934	cg15361247	0.0445015	8.62779	1.12102e-15	2.55478e-12
rs1877933	cg15361247	0.0445015	8.62779	1.12102e-15	2.55478e-12
rs1877932	cg15361247	0.0445015	8.62779	1.12102e-15	2.55478e-12
rs2742369	cg15361247	0.0445015	8.62779	1.12102e-15	2.55478e-12
rs2248991	cg15361247	0.0445015	8.62779	1.12102e-15	2.55478e-12
rs2673034	cg15361247	0.0445015	8.62779	1.12102e-15	2.55478e-12
rs2742385	cg15361247	0.0445015	8.62779	1.12102e-15	2.55478e-12
rs2742389	cg15361247	0.0445015	8.62779	1.12102e-15	2.55478e-12
rs2742390	cg15361247	0.0445015	8.62779	1.12102e-15	2.55478e-12
rs2742393	cg15361247	0.0445015	8.62779	1.12102e-15	2.55478e-12
rs2742373	cg15361247	0.0445015	8.62779	1.12102e-15	2.55478e-12
rs2673025	cg15361247	0.0444901	8.62528	1.13964e-15	2.57951e-12
rs2742452	cg15361247	0.0444901	8.62528	1.13964e-15	2.57951e-12
rs2673065	cg15361247	0.0444732	8.62048	1.17619e-15	2.6502e-12
rs2742462	cg15361247	0.0444732	8.62048	1.17619e-15	2.6502e-12
rs2742418	cg15361247	0.0444531	8.61358	1.23074e-15	2.75787e-12
rs2742419	cg15361247	0.0444531	8.61358	1.23074e-15	2.75787e-12
rs2742368	cg15361247	0.0442278	8.59633	1.37832e-15	3.04365e-12
rs2742386	cg15361247	0.0439222	8.52546	2.19253e-15	4.79905e-12
rs6800556	cg15361247	0.0441312	8.4746	3.05578e-15	6.67388e-12
rs2673033	cg15361247	0.0433682	8.34456	7.10872e-15	1.52579e-11
rs2673052	cg15361247	0.043818	8.29718	9.65367e-15	2.05432e-11
rs2251021	cg15361247	-0.0426576	-8.11299	3.14501e-14	5.94337e-11
rs2673049	cg15361247	-0.0436994	-8.0425	4.92422e-14	9.14942e-11
rs2742392	cg15361247	-0.0436994	-8.0425	4.92422e-14	9.14942e-11
rs2742447	cg15361247	-0.0436994	-8.0425	4.92422e-14	9.14942e-11
rs12633747	cg15361247	-0.0436985	-8.04208	4.93729e-14	9.15664e-11
rs2673053	cg15361247	-0.0472168	-8.02289	5.57623e-14	1.01525e-10
rs2742424	cg15361247	-0.0472168	-8.02289	5.57623e-14	1.01525e-10
rs2742433	cg15361247	-0.0472168	-8.02289	5.57623e-14	1.01525e-10
rs767280	cg15361247	-0.0428654	-7.9598	8.31068e-14	1.46288e-10
rs1468543	cg15361247	-0.0428643	-7.95948	8.32781e-14	1.46288e-10
rs2742406	cg15361247	-0.0428635	-7.95926	8.33899e-14	1.46288e-10
rs9311378	cg15361247	-0.0428635	-7.95926	8.33899e-14	1.46288e-10
rs2742454	cg15361247	-0.0428635	-7.95926	8.33899e-14	1.46288e-10
rs2742435	cg15361247	-0.0428633	-7.95918	8.34328e-14	1.46288e-10
rs2742436	cg15361247	-0.0428633	-7.95918	8.34328e-14	1.46288e-10
rs2742437	cg15361247	-0.0428633	-7.95918	8.34328e-14	1.46288e-10
rs2673039	cg15361247	-0.0428633	-7.95918	8.34328e-14	1.46288e-10
rs2249357	cg15361247	-0.0428633	-7.95918	8.34328e-14	1.46288e-10
rs2742397	cg15361247	-0.0428633	-7.95918	8.34328e-14	1.46288e-10
rs2673028	cg15361247	-0.0428633	-7.95918	8.34328e-14	1.46288e-10
rs9821974;rs71622516	cg15361247	-0.0428633	-7.95918	8.34328e-14	1.46288e-10
rs2742379	cg15361247	-0.0420098	-7.71652	3.81014e-13	6.12027e-10
rs1883094	cg15361247	-0.0447342	-7.56595	9.65065e-13	1.49474e-09
rs12490293	cg15361247	0.0405087	7.51526	1.3165e-12	2.02646e-09
rs2247771	cg15361247	-0.0433378	-7.29757	4.92853e-12	7.14467e-09
rs62242234	cg15361247	-0.0461702	-7.27579	5.61724e-12	8.04932e-09
rs2673048	cg15361247	0.0453826	7.24887	6.60107e-12	9.3648e-09
rs2742457	cg15361247	0.0453826	7.24887	6.60107e-12	9.3648e-09
rs1962800	cg15361247	0.0453242	7.22929	7.42193e-12	1.04107e-08
rs17279465	cg15361247	-0.0395733	-7.13475	1.30329e-11	1.57903e-08
rs2578665	cg15361247	-0.04272	-7.13449	1.3053e-11	1.57955e-08
rs2251109	cg15361247	-0.0410222	-7.1324	1.32158e-11	1.59151e-08
rs2742434	cg15361247	0.0442965	7.12972	1.34279e-11	1.61211e-08
rs2673067	cg15361247	-0.040057	-6.96554	3.5309e-11	3.92025e-08
rs1019129	cg15361247	0.0389117	6.60252	2.84973e-10	2.67491e-07
rs13086609	cg15361247	0.038692	6.58093	3.2195e-10	2.97042e-07
rs2673062	cg15361247	0.038692	6.58093	3.2195e-10	2.97042e-07
rs2673032	cg15361247	0.0386289	6.57855	3.26298e-10	2.97042e-07
rs2673031	cg15361247	0.0386289	6.57855	3.26298e-10	2.97042e-07
rs2742394	cg15361247	0.0386289	6.57855	3.26298e-10	2.97042e-07
rs2673030	cg15361247	0.0386289	6.57855	3.26298e-10	2.97042e-07
rs2742395	cg15361247	0.0386289	6.57855	3.26298e-10	2.97042e-07
rs2673029	cg15361247	0.0386289	6.57855	3.26298e-10	2.97042e-07
rs2742398	cg15361247	0.0386289	6.57855	3.26298e-10	2.97042e-07
rs2064063	cg15361247	0.0386289	6.57855	3.26298e-10	2.97042e-07
rs2064064	cg15361247	0.0386289	6.57855	3.26298e-10	2.97042e-07
rs2064062	cg15361247	0.0386289	6.57855	3.26298e-10	2.97042e-07
rs2742448	cg15361247	0.0386289	6.57855	3.26298e-10	2.97042e-07
rs2742449	cg15361247	0.0386289	6.57855	3.26298e-10	2.97042e-07
rs2742453	cg15361247	0.0386289	6.57855	3.26298e-10	2.97042e-07
rs2742455	cg15361247	0.0386289	6.57855	3.26298e-10	2.97042e-07
rs2742458	cg15361247	0.0386289	6.57855	3.26298e-10	2.97042e-07
rs1468542	cg15361247	0.0386289	6.57855	3.26298e-10	2.97042e-07
rs2742372	cg15361247	0.0386289	6.57855	3.26298e-10	2.97042e-07
rs2742374	cg15361247	0.0386289	6.57855	3.26298e-10	2.97042e-07
rs2742375	cg15361247	0.0386289	6.57855	3.26298e-10	2.97042e-07
rs11547070;rs67739766;rs796745954;rs397714906	cg15361247	0.0386289	6.57855	3.26298e-10	2.97042e-07
rs2742370	cg15361247	0.0386648	6.57336	3.35993e-10	3.0531e-07
rs2673066	cg15361247	0.0385875	6.56421	3.53789e-10	3.18286e-07
rs2531755	cg15361247	0.0385875	6.56421	3.53789e-10	3.18286e-07
rs2673055	cg15361247	0.0385875	6.56421	3.53789e-10	3.18286e-07
rs2253979	cg15361247	0.0385875	6.56421	3.53789e-10	3.18286e-07
rs11709306	cg15361247	0.0385875	6.56421	3.53789e-10	3.18286e-07
rs9826208	cg15361247	0.0385875	6.56421	3.53789e-10	3.18286e-07
rs2742464	cg15361247	0.0385875	6.56421	3.53789e-10	3.18286e-07
rs7631818	cg15361247	0.0385875	6.56421	3.53789e-10	3.18286e-07
rs6807438	cg15361247	0.0385875	6.56421	3.53789e-10	3.18286e-07
rs13059502	cg15361247	0.0385875	6.56421	3.53789e-10	3.18286e-07
rs2742371	cg15361247	0.0385875	6.56421	3.53789e-10	3.18286e-07
rs2742463	cg15361247	0.0386259	6.52055	4.52219e-10	3.97503e-07
rs2673075	cg15361247	0.038044	6.42805	7.58065e-10	6.40888e-07
rs2254828	cg15361247	-0.0344605	-6.0253	6.79113e-09	4.76294e-06
rs893566	cg15361247	-0.0357282	-5.96885	9.16434e-09	6.31182e-06
rs2191027	cg15361247	-0.0414101	-5.90487	1.2842e-08	8.48108e-06
rs2673068	cg15361247	0.0340496	5.80146	2.2037e-08	1.36147e-05
rs7652042	cg15361247	-0.037304	-5.78447	2.40664e-08	1.47859e-05
rs8177177	cg13238348	0.0306314	5.69351	3.84543e-08	2.24091e-05
rs1110650	cg15361247	-0.0342914	-5.64259	4.98763e-08	2.83195e-05
rs66748093	cg15361247	-0.0339223	-5.55733	7.68079e-08	4.28538e-05
rs6808958	cg15361247	-0.0335934	-5.50399	1.00396e-07	5.46369e-05
rs4458403	cg15361247	-0.033468	-5.47961	1.13397e-07	6.04243e-05
rs4682791	cg15361247	-0.033468	-5.47961	1.13397e-07	6.04243e-05
rs10935073	cg13238348	0.0302121	5.26095	3.32262e-07	0.000162287
rs150746871	cg13238348	0.0301038	5.23712	3.72853e-07	0.000180169
rs759796964;rs772087956;rs775266244;rs762040882;rs765403035;rs267238;rs763277973	cg15361247	0.0306198	5.19636	4.53708e-07	0.000213038
rs267218	cg15361247	0.0303361	5.19098	4.65581e-07	0.00021851
rs10433417	cg13238348	0.029923	5.17445	5.03962e-07	0.000233878
rs9829019	cg13238348	0.029923	5.17445	5.03962e-07	0.000233878
rs6780650	cg13238348	0.029923	5.17445	5.03962e-07	0.000233878
rs9846540	cg15361247	0.0374232	5.14724	5.7394e-07	0.000260289
rs9809013	cg15361247	0.0373693	5.14669	5.75453e-07	0.000260501
rs9847280	cg15361247	0.0373693	5.14669	5.75453e-07	0.000260501
rs28581542	cg15361247	0.0373693	5.14669	5.75453e-07	0.000260501
rs200757452	cg13238348	0.0297515	5.14548	5.78761e-07	0.000261873
rs4377517	cg15361247	-0.0322848	-5.11661	6.63994e-07	0.000293381
rs6112624	cg20918393	0.0128669	5.07264	8.17587e-07	0.000351422
rs17261269	cg15361247	-0.0308901	-5.05528	8.87308e-07	0.000376676
rs147118808	cg13238348	0.0293015	5.03814	9.61737e-07	0.000391421
rs4525863	cg13238348	0.0288395	5.03757	9.64327e-07	0.000392314
rs6801100	cg15361247	0.0365998	5.02592	1.01849e-06	0.00041066
rs12486907	cg15361247	0.0370007	4.99347	1.18536e-06	0.000460419
rs4683139	cg15361247	0.033521	4.9858	1.22846e-06	0.000475677
rs4459901	cg13238348	0.0279861	4.96321	1.36456e-06	0.000518697
rs7638902	cg15361247	0.0366238	4.92215	1.65024e-06	0.000610737
rs3733107	cg15361247	0.0366238	4.92215	1.65024e-06	0.000610737
rs4683137	cg15361247	0.0366279	4.90455	1.78973e-06	0.000653378
rs4683134	cg15361247	0.0365342	4.90123	1.81722e-06	0.000661234
rs72622921	cg15361247	0.0365342	4.90123	1.81722e-06	0.000661234
rs12493287	cg15361247	0.0365342	4.90123	1.81722e-06	0.000661234
rs4683135	cg15361247	0.0365342	4.90123	1.81722e-06	0.000661234
rs2012762	cg15361247	-0.0298074	-4.89293	1.88793e-06	0.000684211
rs13094153	cg15361247	-0.0300558	-4.88948	1.91805e-06	0.000693615
rs4401397	cg15361247	-0.0297578	-4.87657	2.03516e-06	0.00073092
rs370282638	cg13238348	0.0278997	4.85815	2.21416e-06	0.000789514
rs9862579	cg13238348	0.0278418	4.84808	2.31837e-06	0.000806462
rs13089744	cg15361247	-0.0297456	-4.81818	2.65647e-06	0.000904791
rs8177178	cg13238348	0.0277737	4.81654	2.67629e-06	0.000909677
rs143071821	cg13238348	0.0276619	4.81635	2.67871e-06	0.000910189
rs9820225;rs71620530;rs35553929	cg13238348	-0.027132	-4.79952	2.89109e-06	0.000968476
rs267237	cg15361247	-0.0279347	-4.7891	3.03072e-06	0.00100813
rs6782523	cg13238348	0.0276873	4.78608	3.07248e-06	0.00101828
rs335605	cg17430199	-0.0389401	-4.7352	3.86341e-06	0.001234
rs267239	cg15361247	0.0286263	4.73383	3.88716e-06	0.00124039
rs4682797	cg15361247	0.0352198	4.72609	4.02441e-06	0.00127805
rs267244	cg15361247	0.0277112	4.67016	5.16392e-06	0.00155701
rs267245	cg15361247	0.0277046	4.66894	5.19192e-06	0.00156451
rs3733110	cg15361247	0.0345057	4.62133	6.4081e-06	0.00186934
rs6794915	cg15361247	0.0345057	4.62133	6.4081e-06	0.00186934
rs6698736	cg16317523	-0.0203519	-4.61478	6.59553e-06	0.00191895
rs12119579	cg16317523	-0.0203519	-4.61478	6.59553e-06	0.00191895
rs12145081	cg16317523	-0.0203519	-4.61478	6.59553e-06	0.00191895
rs4609393	cg16317523	-0.0203519	-4.61478	6.59553e-06	0.00191895
rs11713933	cg15361247	0.0341604	4.61465	6.59939e-06	0.00191951
rs35848059	cg15361247	-0.0282515	-4.59768	7.11029e-06	0.00205372
rs4607832	cg16317523	-0.0201177	-4.57435	7.87472e-06	0.00224714
rs12729088	cg16317523	-0.0201177	-4.57435	7.87472e-06	0.00224714
rs6689503	cg16317523	-0.0201177	-4.57435	7.87472e-06	0.00224714
rs2182596	cg16317523	-0.0201177	-4.57435	7.87472e-06	0.00224714
rs2182597	cg16317523	-0.0201177	-4.57435	7.87472e-06	0.00224714
rs1866403	cg15361247	0.0347769	4.53649	9.28658e-06	0.00259452
rs267215	cg15361247	-0.0268054	-4.53184	9.47614e-06	0.00264427
rs267216	cg15361247	-0.026776	-4.52667	9.69086e-06	0.00269212
rs386683034;rs6812194	cg10716612	0.0265749	4.52472	9.77337e-06	0.00271051
rs2148625	cg16317523	-0.0196962	-4.47564	1.20794e-05	0.00324085
rs2148626	cg16317523	-0.0196962	-4.47564	1.20794e-05	0.00324085
rs6663585	cg16317523	-0.0196859	-4.47341	1.21956e-05	0.00326676
rs6424905	cg16317523	-0.0196859	-4.47341	1.21956e-05	0.00326676
rs6424906	cg16317523	-0.0196859	-4.47341	1.21956e-05	0.00326676
rs7543703	cg16317523	-0.0196859	-4.47341	1.21956e-05	0.00326676
rs267217	cg15361247	-0.0266189	-4.46164	1.28278e-05	0.00340314
rs13083425	cg15361247	-0.0277952	-4.4568	1.30963e-05	0.00346514
rs2182594	cg16317523	-0.0197259	-4.44302	1.38919e-05	0.00365429
rs13074123	cg15361247	-0.0274664	-4.42119	1.52482e-05	0.00397327
rs12693019	cg02893324	0.029789	4.41828	1.5438e-05	0.00401644
rs4489521	cg16317523	-0.0194422	-4.38678	1.76469e-05	0.0045191
rs12117797	cg16317523	-0.0194187	-4.38297	1.79341e-05	0.00458439
rs60771493	cg16317523	-0.0194187	-4.38297	1.79341e-05	0.00458439
rs6770412	cg15361247	0.0269676	4.36542	1.93137e-05	0.00477019
rs1866633	cg02893324	0.0292986	4.36479	1.93653e-05	0.00477972
rs6658466	cg16317523	-0.0194412	-4.3625	1.95531e-05	0.0048189
rs7553722	cg16317523	-0.019111	-4.34971	2.0635e-05	0.00503941
rs6701811	cg16317523	-0.019111	-4.34971	2.0635e-05	0.00503941
rs12753772	cg16317523	-0.019111	-4.34971	2.0635e-05	0.00503941
rs12133984	cg16317523	-0.019111	-4.34971	2.0635e-05	0.00503941
rs12138213	cg16317523	-0.019111	-4.34971	2.0635e-05	0.00503941
rs12130947	cg16317523	-0.019111	-4.34971	2.0635e-05	0.00503941
rs12138300	cg16317523	-0.019111	-4.34971	2.0635e-05	0.00503941
rs1926838	cg16317523	-0.019111	-4.34971	2.0635e-05	0.00503941
rs1926839	cg16317523	-0.019111	-4.34971	2.0635e-05	0.00503941
rs1866632	cg02893324	0.0287554	4.31405	2.39637e-05	0.00571635
rs10198810	cg02893324	0.0290127	4.30998	2.43749e-05	0.00580194
rs10911428	cg16317523	0.0191389	4.30752	2.4626e-05	0.00584772
rs6658871	cg16317523	0.0191389	4.30752	2.4626e-05	0.00584772
rs7520083	cg16317523	0.0191389	4.30752	2.4626e-05	0.00584772
rs10797903	cg16317523	0.0191389	4.30752	2.4626e-05	0.00584772
rs12738712	cg16317523	0.0191389	4.30752	2.4626e-05	0.00584772
rs3820689	cg16317523	0.0191375	4.30714	2.46653e-05	0.00585007
rs7539345	cg16317523	0.0191375	4.30714	2.46653e-05	0.00585007
rs7552115	cg16317523	0.0191375	4.30714	2.46653e-05	0.00585007
rs2182593	cg16317523	0.0191375	4.30714	2.46653e-05	0.00585007
rs2148621	cg16317523	0.0191375	4.30714	2.46653e-05	0.00585007
rs6660352	cg16317523	-0.0189116	-4.30628	2.47546e-05	0.00586428
rs6424908	cg16317523	-0.0189116	-4.30628	2.47546e-05	0.00586428
rs7514445	cg16317523	-0.0189116	-4.30628	2.47546e-05	0.00586428
rs12726055	cg16317523	-0.0189092	-4.30526	2.48595e-05	0.00588354
rs2004077	cg16317523	-0.0189058	-4.30469	2.49195e-05	0.00588552
rs10911421	cg16317523	-0.0189057	-4.30427	2.49625e-05	0.00588552
rs7532280	cg16317523	-0.0189057	-4.30427	2.49625e-05	0.00588552
rs7554816	cg16317523	-0.0189057	-4.30427	2.49625e-05	0.00588552
rs7524241	cg16317523	-0.0189057	-4.30427	2.49625e-05	0.00588552
rs1926827	cg16317523	-0.0189057	-4.30427	2.49625e-05	0.00588552
rs6660412	cg16317523	-0.0189057	-4.30427	2.49625e-05	0.00588552
rs2148620	cg16317523	-0.0189057	-4.30427	2.49625e-05	0.00588552
rs7553224	cg16317523	-0.0189057	-4.30427	2.49625e-05	0.00588552
rs1073848	cg16317523	-0.0189057	-4.30427	2.49625e-05	0.00588552
rs4087609	cg16317523	-0.0189057	-4.30427	2.49625e-05	0.00588552
rs10752915	cg16317523	-0.0189057	-4.30427	2.49625e-05	0.00588552
rs10911426	cg16317523	-0.0189057	-4.30427	2.49625e-05	0.00588552
rs7536447	cg16317523	-0.0189057	-4.30427	2.49625e-05	0.00588552
rs12760943	cg16317523	-0.0187797	-4.28173	2.74193e-05	0.00637277
rs7552887	cg16317523	-0.0187787	-4.2815	2.74461e-05	0.00637749
rs7525146	cg16317523	-0.0187763	-4.28107	2.74947e-05	0.00637985
rs7530552	cg16317523	-0.0187763	-4.28107	2.74947e-05	0.00637985
rs12120527	cg16317523	-0.0187763	-4.28107	2.74947e-05	0.00637985
rs10911427	cg16317523	-0.0187763	-4.28107	2.74947e-05	0.00637985
rs7529946	cg16317523	-0.0187763	-4.28107	2.74947e-05	0.00637985
rs12133760	cg16317523	-0.0187763	-4.28107	2.74947e-05	0.00637985
rs7552987	cg16317523	-0.0187721	-4.27991	2.76271e-05	0.00640311
rs2148627	cg16317523	-0.0187614	-4.27838	2.78042e-05	0.00643818
rs12493946	cg15361247	0.0298579	4.24312	3.21744e-05	0.00728082
rs832880	cg17927313	0.0105266	4.19323	3.94953e-05	0.00863251
rs17559937	cg16317523	-0.0186903	-4.18149	4.14357e-05	0.00901012
rs12746073	cg16317523	-0.0186214	-4.1683	4.37236e-05	0.0094253
rs12734523	cg16317523	0.0185362	4.16339	4.46066e-05	0.00959287
rs1926830	cg16317523	0.0185316	4.16277	4.47199e-05	0.00960903
rs10752916	cg16317523	0.0185327	4.16276	4.47206e-05	0.00960903
rs10752917	cg16317523	0.0185327	4.16276	4.47206e-05	0.00960903
rs1887245	cg16317523	0.0185314	4.16225	4.48144e-05	0.00962711
rs12119590	cg16317523	0.0185287	4.16149	4.49523e-05	0.00965256
rs6046430	cg25291653	-0.0110713	-4.12169	5.28188e-05	0.011086
rs56402527	cg16317523	0.0183406	4.09355	5.91563e-05	0.012166
rs12562713	cg16317523	0.0183406	4.09355	5.91563e-05	0.012166
rs2191028	cg15361247	-0.02566	-4.03822	7.37888e-05	0.014671
rs13066873	cg15361247	-0.0251858	-4.03	7.62363e-05	0.0150603
rs4994581	cg13238348	-0.0227607	-4.02808	7.68193e-05	0.0151376
rs4994582	cg13238348	-0.0227607	-4.02808	7.68193e-05	0.0151376
rs4994583	cg13238348	-0.0227607	-4.02808	7.68193e-05	0.0151376
rs267247	cg15361247	-0.023826	-3.99433	8.77849e-05	0.0168874
rs900327	cg15361247	0.0252554	3.97079	9.62972e-05	0.0181567
rs1926837	cg16317523	0.0177013	3.97029	9.64858e-05	0.0181682
rs12927152	cg18431702	0.012459	3.96928	9.68691e-05	0.0182255
rs9876474	cg15361247	0.0266504	3.96827	9.72519e-05	0.0182561
rs12739778	cg16317523	0.0177825	3.96524	9.84123e-05	0.0184022
rs12132735	cg16317523	0.0177825	3.96524	9.84123e-05	0.0184022
rs1887246	cg16317523	0.0177808	3.96517	9.84403e-05	0.018404
rs6699197	cg16317523	0.0177661	3.96214	9.9617e-05	0.0185891
rs34484934	cg16317523	0.0177633	3.96157	9.98376e-05	0.0186233
rs386660671;rs9853624	cg15361247	0.0247499	3.95731	0.000101517	0.0186805
rs7188518	cg18431702	0.0127704	3.93489	0.000110802	0.0199294
rs6112624	cg25291653	0.0109716	3.93337	0.000111462	0.0200228
rs267236	cg15361247	-0.0234006	-3.93274	0.000111732	0.0200551
rs2340938	cg02240352	-0.0365713	-3.92972	0.000113053	0.0202284
rs2974239	cg02240352	-0.0365713	-3.92972	0.000113053	0.0202284
rs2974240	cg02240352	-0.0365713	-3.92972	0.000113053	0.0202284
rs12926849	cg18431702	0.0121556	3.89931	0.00012721	0.0221914
rs745424354;rs66837882;rs76147362;rs374037258	cg16317523	0.0170948	3.8923	0.000130705	0.0226924
rs6509172	cg05670193	0.0139185	3.8853	0.000134284	0.023226
rs13086458	cg15361247	-0.0240847	-3.88274	0.000135617	0.0233719
rs28448519	cg18431702	0.0121936	3.87906	0.000137553	0.023633
rs1532303	cg18431702	0.0122831	3.87825	0.000137984	0.0236849
rs35048171	cg17927313	0.0102041	3.8754	0.000139505	0.0239008
rs9302235	cg17927313	0.0102041	3.8754	0.000139505	0.0239008
rs879201	cg17927313	0.0101533	3.86752	0.000143801	0.0245144
rs1107528	cg17927313	0.0101533	3.86752	0.000143801	0.0245144
rs56206232	cg15361247	-0.0238345	-3.85349	0.000151755	0.0255179
rs2624674	cg15361247	0.0246353	3.82825	0.000167131	0.0272642
rs1926825	cg16317523	-0.0183025	-3.82234	0.000170936	0.0277162
rs6424909	cg16317523	-0.0183025	-3.82234	0.000170936	0.0277162
rs6703990	cg16317523	-0.0183025	-3.82234	0.000170936	0.0277162
rs2334282	cg02240352	-0.0218637	-3.8147	0.00017598	0.0282952
rs6136874	cg25291653	-0.0105702	-3.81436	0.000176205	0.028307
rs9928526	cg18431702	0.0121591	3.79306	0.000191041	0.0298027
rs6136874	cg20918393	-0.0097482	-3.78709	0.000195401	0.0302262
rs6684415	cg16317523	-0.0179317	-3.78605	0.000196171	0.0302476
rs6132240	cg25291653	-0.0106156	-3.78285	0.000198559	0.0305448
rs6136873	cg25291653	-0.0106156	-3.78285	0.000198559	0.0305448
rs34378743	cg15361247	-0.0233766	-3.77809	0.000202159	0.0309648
rs9645305	cg16317523	-0.0178082	-3.77192	0.000206921	0.0315775
rs17488675	cg16317523	-0.0183766	-3.76226	0.000214588	0.0325233
rs6046430	cg20918393	-0.00943059	-3.75902	0.000217215	0.0328614
rs2145552	cg25291653	-0.0107207	-3.75377	0.000221547	0.0333496
rs35039854	cg16317523	-0.0176838	-3.73645	0.000236412	0.0349742
rs6046404	cg25291653	-0.0107327	-3.71587	0.000255293	0.0370147
rs6132240	cg20918393	-0.00966831	-3.70626	0.000264588	0.0378221
rs6136873	cg20918393	-0.00966831	-3.70626	0.000264588	0.0378221
rs2491428	cg16317523	-0.0178175	-3.69071	0.000280313	0.039503
rs6046415	cg25291653	-0.0101373	-3.67143	0.000301038	0.0414042
rs6046415	cg20918393	-0.00937311	-3.65526	0.000319517	0.0432411
rs4802376	cg02240352	-0.0208872	-3.63824	0.000340128	0.0453404
rs4507976	cg16317523	-0.0161208	-3.62763	0.000353601	0.0465985
rs7199847	cg18431702	0.0112256	3.62323	0.000359334	0.0471994
rs6046396	cg25291653	-0.0101784	-3.60794	0.000379952	0.0492003
